# Supplementary material for: Clinical subphenotypes of sepsis based on mixed data and differences in treatment effects: a cluster analysis of multicentre observational studies
Source: Research Square preprint supplement (doi:10.21203/rs.3.rs-7716199/v1), 2025-10-15
Supplement: Supplementary file 1 [file 0de675cc5f08da09c0e7740c.pdf]

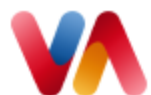

**In patients with sepsis, 3-5 subphenotypes** show different responses to diverse treatments.

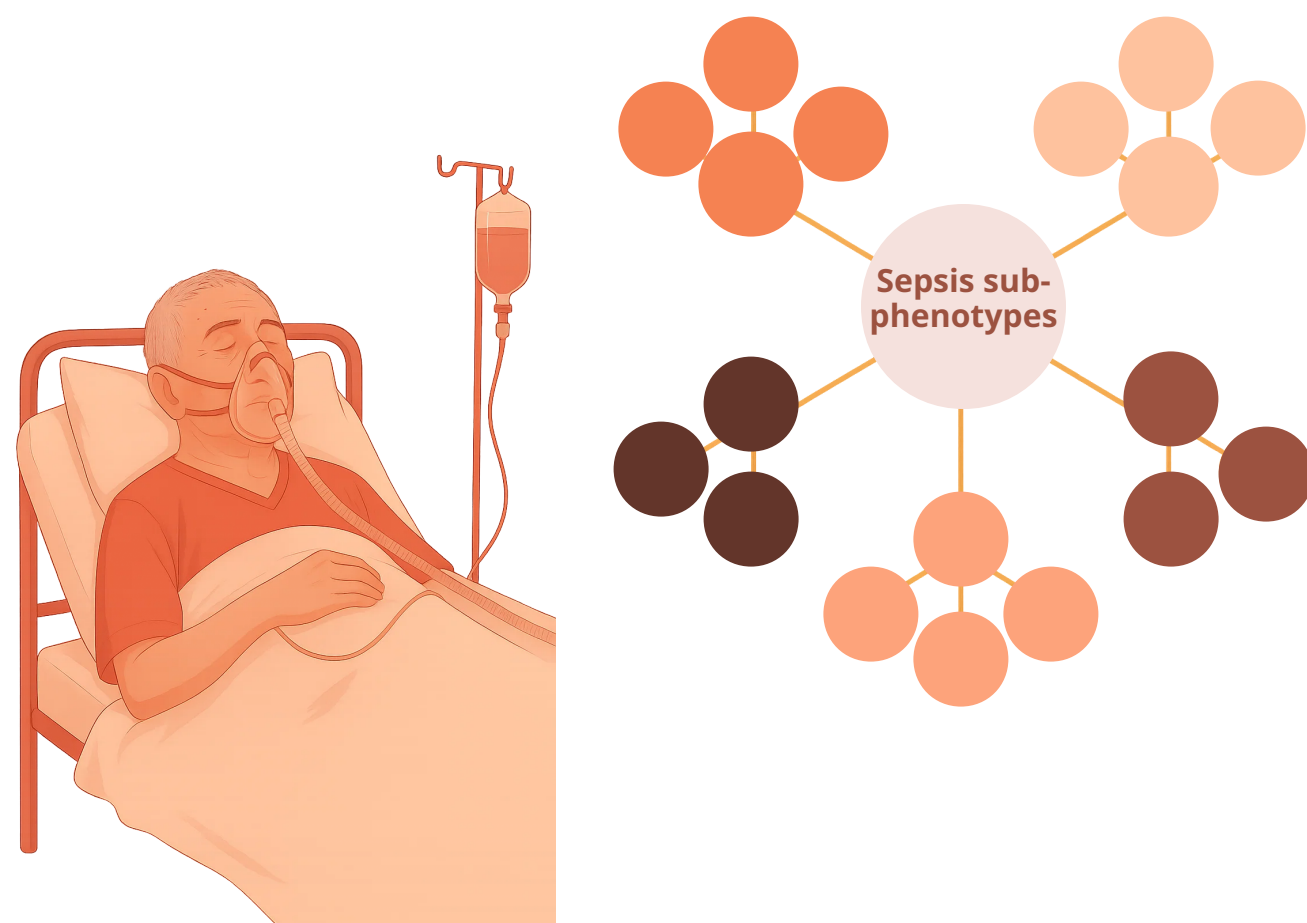

## 1. KEY MESSAGE

**Sepsis subphenotypes with differing responses to treatments can be identified by cluster analysis** of mixed clinical data, suggesting a path toward more personalized therapy.

## Primary outcome:

In-hospital mortality rate of different sepsis sub-phenotypes

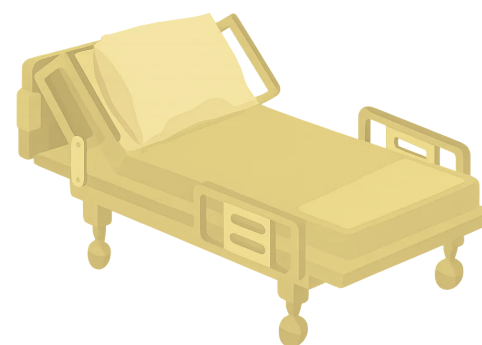

## 2. MAIN RESULTS

**Three or five subphenotypes** with different hospital mortalities, patient characteristics, and treatment effects were identified.

**Recombinant thrombomodulin showed significant efficacy in subphenotype 1** in both k-UMAP analyses (number of clusters = 3; number of clusters = 5).

**Antithrombin III was significantly effective in subphenotype 2** in the k-UMAP analysis with five clusters.

## 3. METHODS

**Study type:** Secondary analysis of multicenter observational registries.

**Study cohort:** 1,756 patients with sepsis admitted to intensive care units in Japan.

**Methods:** Cluster analysis using k-UMAP, k-prototype, and KAMILA on 52 admission variables, followed by logistic regression with propensity score weighting to assess treatment effects by subphenotype.

**Japanese ICU patients with Sepsis**

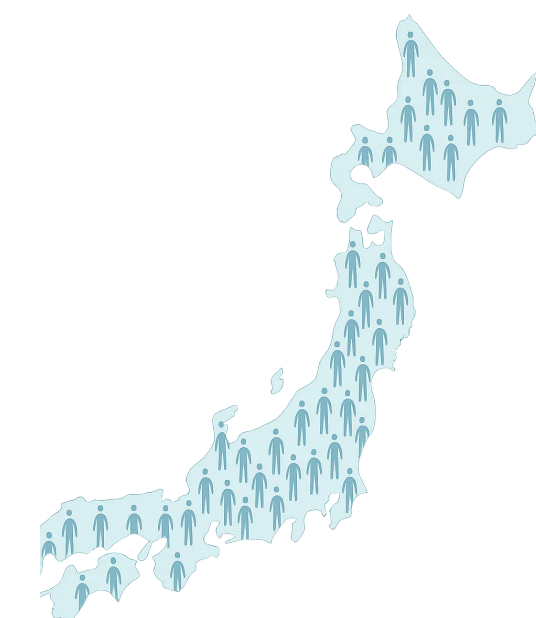

**> 1,700**
