# Supplementary material for: Clinical subphenotypes of sepsis based on mixed data and differences in treatment effects: a cluster analysis of multicentre observational studies
Source: Research Square preprint supplement (doi:10.21203/rs.3.rs-7716199/v1), 2025-10-15
Supplement: Supplementary file 1 [file fcc3fbaf7f60098bf15ca095.docx]

**Additional file 1:**

**Clinical subphenotypes of sepsis based on mixed data and differences in treatment effects**

**Authors**

Yuta Yokokawa Ph.D,1 Rieko Sakurai Ph.D,2 Daisuke Kudo Ph.D,1 Gen Tamiya Ph.D,2,3,4 Shigeki Kushimoto Ph.D,1

**Table of Contents**

***Supplemental ｍethods*…………………………………………………………………….…….….……..3**

**Description of the four sepsis cohorts included in our study…………………………….…..………3**

**Sepsis identification in each dataset……………………………………………………..……….……3**

**Table S1. Clinical Variables and Clinical Outcomes used in the study……...……………...………4**

**Clustering methods……………………………………………………………………….………….…6**

**Table S2. Parameter setting for clustering methods……………………………………………...….8**

**Statistical model of treatment effects………………………………………………………………….8**

**Table S3. R packages used in the study……………………………………………………………….9**

***Supplemental results.*……………………………………………………………………………………..11**

**Figure S1 Influence of the ratio of categorical variables to continuous variables on clustering performance in simulation studies. ………………………………………………………………...…..11**

**Table S4. Missing data (no., %) across registries for variables…………………………………....12**

**Figure S2. Density plot comparing observed versus imputed data. ……………………………….15**

**Figure S3. Independence of variable introduced in analysis. …………………...…………............16**

**Figure S4 Adjusted Rand Indexes between clustering methods at cluster number 2………….....17**

**Figure S5Adjusted Rand Indexes between clustering methods at cluster number 3…………......17**

**Figure S6 Adjusted Rand Indexes between clustering methods at cluster number 4………….....18**

**Figure S7 Adjusted Rand Indexes between clustering methods at cluster number 5………….....18**

**Figure S8 Adjusted Rand Indexes between clustering methods at cluster number 6………….....19**

**Figure S9 Adjusted Rand Indexes between clustering methods at cluster number 7………….....19**

**Figure S10. Consensus clustering results of k-UMAP [nn=100]…………...………………………20**

**Figure S11. Consensus clustering results of k-UMAP [nn=200]…………………………………...21**

**Figure S12. Consensus clustering results of KAMILA…………...…………………………...........22**

**Figure S13. Patients transition of k-UMAP [nn=100, k=3] and k-UMAP [nn=200, k=5]..............23**

**Figure S14. Consensus clustering results of k-UMAP [nn=100] in validation dataset…...………24**

**Figure S15. UMAP plot of derivation and validation cluster…………...………………………….25**

**Table S5. Characteristics of patients clustered using k-UMAP [nn=200]……...………………….26**

**Table S6. Characteristics of patients clustered using KAMILA……...……………………............29**

**Table S7. Characteristics of patients clustered using k-UMAP [nn=100, k=3] in validation dataset…………………………………………………………………………………………………….32**

**Figure S16. Odds ratios for interaction of the treatment and subphenotypes for hospital mortality in each clustering methods in septic shock patients…………..…………............................35**

**Table S8. Comparisons of subphenotypes of sepsis identified in our study and that reported in the literature..……………………………………………………………………………….....................36**

***References…………………………………………………………………………………………..........*.37**

**Supplemental Methods**

**Description of the four sepsis cohorts included in our study**

・Tohoku Sepsis Registry

The Tohoku Sepsis Registry (UMIN000010297) was a prospective observational study involving 616 patients admitted to 10 institutions (three university hospitals and seven community hospitals) in Tohoku District, Northeastern Japan, between January 2015 and December 2015 [S1].

・FORECAST sepsis study

The Focused Outcomes Research in Emergency Care for Acute Respiratory Distress Syndrome, Sepsis, and Trauma (FORECAST) sepsis study (UMIN000019742) was a multicenter, prospective study that enrolled 1,184 patients admitted to 59 intensive care units (ICUs) in Japan, between January 2016 and March 2017 [S2].

・JAAM SPICE-ICU

Japanese Association for Acute Medicine Sepsis Prognostication in the Intensive Care Unit and Emergency Room (JAAM SPICE-ICU) was a multicenter, prospective cohort study conducted in 22 intensive care units in Japan from December 2017 to May 2018 [S3].

・JAAM MAESTRO

Japanese Association for Acute Medicine Multicenter Assessment for Sepsis Treatment and Outcome (JAAM MAESTRO) was a multicenter observational study that was conducted in 17 intensive care units (ICUs) at tertiary hospitals in Japan from July 2019 to August 2020 [S4].

**Sepsis identification in each dataset**

TSR and FORECAST included patients with severe sepsis based on the sepsis-2 criteria [S5].

JAAM SPICE-ICU and JAAM MAESTRO included patients with severe sepsis based on the sepsis-3.0 criteria [S6].

**Table S1. Clinical Variables and treatments used in the study**

| Variables | Descriptions |
| --- | --- |
| Age | measured at admission |
| Sex | Male/Female |
| BMI | Body Mass Index measured in kg/m2 at admission |
| Location Before ICU | Admission route to intensive care unit: from emergency room, already admitted to the ICU with other disease, others |
| AMI | Past medical history of acute myocardial infarction at admission |
| AHF | Past medical history of acute heart failure at admission |
| PAD | Past medical history of peripheral arterial disease at admission |
| Stroke | Past medical history of Stroke at admission |
| Chronic Lung Disease | Past medical history of chronic lung disease at admission |
| Collagen Disease | Past medical history of collagen disease at admission |
| Peptic Ulcer | Past medical history of peptic ulcer at admission |
| Liver Disease | Past medical history of liver disease at admission |
| DM | Past medical history of diabetes at admission |
| CKD | Past medical history of chronic kidney disease at admission |
| Malignancy | Past medical history of malignancy at admission |
| Metastatic Neoplasm | Past medical history of metastatic neoplasm at admission |
| Steroid | Medication of steroid at admission |
| Immunosuppressant | Medication of immunosuppressant at admission |
| Statin | Medication of statin at admission |
| Antiplatelet | Medication of antiplatelet at admission |
| Beta Blocker | Medication of beta blocker at admission |
| Radiotherapy | Treatment history of radiotherapy at admission |
| GCS | Glasgow Coma Scale measured at admission |
| RR | Respiratory rate measured in /minutes at admission |
| HR | Heart Rate measured in /minutes at admission |
| SBP | Systolic blood pressure measured in mmHg at admission |
| DBP | Diastolic blood pressure measured in mmHg at admission |
| BT | Body Temperature measured in degree at admission |
| WBC | White blood cell count in × 103/µL at admission |
| Hct | Hematocrit measured in percent at admission |
| Plt | Platelet count measured in 104/µL at admission |
| Cre | Serum creatinine measured in mg/dL at admission |
| Bil | Total bilirubin measured in mg/dL at admission |
| Glu | Serum glucose measured in mg/dL at admission |
| Na | Serum sodium measured in mEq/L at admission |
| K | Serum potassium measured in mEq/L at admission |
| CRP | Serum C-reactive protein measured in mg/dL at admission |
| PT-INR | Prothrombin Time-International Normalized Ratio measured at admission |
| APTT | Serum activated partial thromboplastin time measured in second at admission |
| DD | Serum D-dimer measured in µg/mL at admission |
| Fbg | Serum fibrinogen measured in mg/mL at admission |
| pH | Serum pH at admission |
| PaCO2 | measured in mmHg at admission |
| PaO2 | measured in mmHg at admission |
| BE | Serum base excess measured in mEq/L at admission |
| Lactate | Serum lactate measured in mmol/L at admission |
| SOFA.PFR | Respiratory component of the SOFA score at admission.  0 point: PaO2/FiO2 > 400mmHg; 1 point: PaO2/FiO2 < 400mmHg; 2 points: PaO2/FiO2 < 300mmHg; 3 points: PaO2/FiO2 < 200mmHg with respiratory support; 4 points: PaO2/FiO2 < 100mmHg with respiratory support |
| SOFA.Coag | Coagulation component of the SOFA score at admission.  0 point: Platelets > 150×103/mm3; 1 point: Platelets < 150×103/mm3; 2 points: Platelets < 100×103/mm3; 3 points: Platelets < 50×103/mm3; 4 points: Platelets < 20×103/mm3 |
| SOFA.Liver | Hepatic component of the SOFA score at admission.  0 point: Bilirubin < 1.2 mg/dl; 1 point: Bilirubin 1.2-1.9 mg/dl; 2 points: Bilirubin 2.0-3.4 mg/dl; 3 points: Bilirubin 3.5-4.9 mg/dl; 4 points: Bilirubin > 5.0 mg/dl; |
| SOFA.CV | Cardiovascular component of the SOFA score at admission.  0 point: MAP > 70 mmHg; 1 point: MAP < 70 mm/Hg; 2 points: Dopamine ≤ 5μg/kg/min or dobutamine (any dose); 3 points: Dopamine > 5μg/kg/min or epinephrine ≤ 0.1 μg/kg/min or norepinephrine ≤ 0.1μg/kg/min; 4 points: Dopamine > 15 μh/kg/min or epinephrine > 0.1μg/kg/min or norepinephrine > 0.1 μg/kg/min |
| SOFA.GCS | Central Nervous System component of the SOFA score at admission.  0 point: Glasgow Coma Score 15; 1 point: Glasgow Coma Score 13-14; 2 points: Glasgow Coma Score 10-12; 3 points: Glasgow Coma Score 6-9; 4 points: Glasgow Coma Score <6 |
| SOFA.Renal | Renal component of the SOFA score at admission.  0 point: Creatinine < 1.2 mg/dl; 1 point: Creatinine 1.2-1.9 mg/dl; 2 points: Creatinine 2.0-3.4 mg/dl; 3 points: Creatinine 3.5-4.9 mg/dl or urine output < 500ml/day; 4points: Creatinine > 5.0 mg/dl or urine output < 200ml/day |
| Treatments | Descriptions |
| VAS | Administration of vasopressin during hospitalization |
| Corticosteroids | Administration of corticosteroids during hospitalization |
| rTM | Administration of recombinant thrombomodulin during hospitalization |
| ATⅢ | Administration of antithrombin III during hospitalization |
| IVIg | Administration of immunoglobulin during hospitalization |
| PMX | Treatment of Direct hemoperfusion with polymyxin B-immobilized fibers during hospitalization |

*Abbreviation:* BMI = Body Mass Index, AMI = acute myocardial infarction, AHF = acute heart failure, PAD = peripheral arterial disease, DM = diabetes, CKD = chronic kidney disease, GCS = Glasgow Coma Scale, RR = Respiratory rate, HR = Heart Rate, SBP = Systolic blood pressure, DBP = Diastolic blood pressure, BT = Body Temperature, WBC = White blood cell, Hct = Hematocrit, Plt = Platelet, Cre = creatinine, Bil = Total bilirubin, Glu = glucose, Na = sodium, K = potassium, CRP = C-reactive protein, PT-INR = Prothrombin Time-International Normalized Ratio, APTT = activated partial thromboplastin time, DD = D-dimer, Fbg = fibrinogen, BE = base excess, SOFA.PFR = Respiratory component of the SOFA score, SOFA.Coag = Coagulation component of the SOFA score, SOFA.Liver = Hepatic component of the SOFA score, SOFA.CV = Cardiovascular component of the SOFA score, SOFA.GCS = Central Nervous System component of the SOFA score, SOFA.Renal = Renal component of the SOFA score, ATⅢ= antithrombin III, IVIg = immunoglobulin, PMX = polymyxin B-immobilized fiber column hemoperfusion, rTM = recombinant thrombomodulin, VAS = vasopressin

**Clustering methods**

Our dataset contains numeric and categorical data, called “heterogeneous” or “mixed” data. We considered the k-prototype and KAymeans for MIxed LArge data (KAMILA), which were recommended in a previous study [S7], and k-means for the Uniform Manifold Approximation and Projection for Dimension Reduction [S8], we called k-UMAP. k-UMAP is an analogy of the Principal Component Analysis (PCA). The primary motivation for using PCA is dimension reduction, so we can reduce noise but not apply it to mixed data. In contrast, UMAP is also used for dimension reduction and can select proper metrics depending on the data. Therefore, we adapted UMAP. The study [S9] reported that UMAP has the effect of refining clustering and that it is better to use clustering methods, for example, k-means and Density-Based Spatial Clustering of Applications with Noise (DBSAN), on UMAP than alone. However, this is the first study to examine the characteristics of the k-UMAP using mixed data.

The clustering method for mixed data has struggled to determine the balance of contribution between numerical and categorical data to a clustering result because of different metrics that cannot be linked together consistently. Thus, they set the weights as hyperparameters and leave the decision to the user. Although k-UMAP has no parameters for such balancing, it integrates the graphs for each metric generated by UMAP. The details of the balancing for each method are as follows.

*1. k-prototype*

In the case of the k-prototype, the weight parameters are given as . The distance function was defined as follows:

Where m is an index of the overall variables in the data, the first q variables are numeric, and the remaining p-q variables are categorical. Note that for a=b and for . Thus, the distance for categorical data corresponds to the count of mismatches. In the optimization, the following objective function is minimized in the same manner as k-means.

where represents the elements of the n × k binary partition matrix U satisfying . The k-prototype has been extended to estimate the optimal lambda, ssatisfying  where a is either the mean of standard deviation or variance of overall numerical variables, and b is either the mean of where j is an indicator of several categories such that j=1,2,…,J so as to make the variation of the second term of [S1] equivalent to that of the first term for the contribution to the distance d [S10].

*2. KAMILA*

In the case of KAMILA, the kernel density estimation technique was applied to the numerical data, and the multinomial probability mass function was assessed for categorical data. In the optimization, the following objective function is maximized:

where is an indicator of clusters, such that . The first term of  represents for numeric data, and is the kernel density estimate derived using the distance, such that

, where is data of i-th sample and p-th numeric variable, and is a centroid of p-th numeric variable of g-th cluster. The second term of is used for categorical data such that

, where m is the multinomial probability mass function with parameters for q-th variable and g-th cluster and is data of i-th sample and q-th categorical variable. Note that and are the weight parameters set to 1 as default so as to be equivalent contribution for all over the variables.

*3. k-UMAP*

In the case of k-UMAP, the UMAP minimizes the following function [UMAP for t-SNE].

where is the weight of the edge on the graph in the high-dimensional input space and is calculated as follows:

, where is the distance between inputs and, is the distance to the nearest neighbor, and is analogous to the parameter of the perplexity calibration used in the Stochastic Neighbor Embedding (SNE) [S11].  is the weight of the edge on the graph in the low-dimensional output space as follows:

where is the distance between outputs and , called embedding. and are the UMAP parameters. The sampling of the positive edge is proportional to the weight of the edge,  and the value of the gradient is calculated by assuming . In other words, the nearest neighbor samples in the input space contribute to the first term of the objective function, whereas the other samples contribute to the second term, which adds strength to the weight of the edges. The objective function of UMAP does not need to calculate all the output pairwise distances, which is amenable to stochastic gradient descent techniques and is effective for application to large-scale datasets.

In k-UMAP, the embeddings are input to k-means. The k-UMAP has no parameter that balances numeric and categorical data contributions. Alternatively, the graphs of UMAP on different metrics (the set of estimated depending on the distance functions) can be integrated by intersecting the edges. R package uwot [S12] provides such an approach, and we can select the same distance functions as the k-prototype: the Euclidean distance for numeric data and the Hamming distance for categorical data. The Hamming distance corresponds to the distance for categorical data in the k-prototype when the two input datasets are binary and of equal length.

The behavior of k-UMAP was validated using the same simulation data as in [S7], the results of which are provided in the Supplement. From the simulation, we found that k-UMAP was dominant in clustering datasets with many categorical variables. Therefore, we considered it for the exploration of a wide range of patient characteristics.

**Table S2. Parameter setting for clustering methods**

| Clustering methods | Approaches for different data types | Parameters | Number of clusters |
| --- | --- | --- | --- |
| k-prototype | Distance function approach (Numeric: Euclidean, Categorical/Binary: Hamming) | lambda = 0.01, 1, 10, 20, 50 | 2,3,4,5,6,7 |
| KAMILA | Density function approach (Numeric: kernel density functions, Categorical/Binary: Multinomial distribution function) | ξ=1 | 2,3,4,5,6,7 |
| k-UMAP | Graph approach with distance function (Numeric: Euclidean, Categorical/Binary: Hamming) | number of neighbors = 50, 100, 200, 300  number of components = 2 | 2,3,4,5,6,7 |

**Statistical model of treatment effects**

We considered the treatment work for specific cluster members. Therefore, we use the following regression model with interactions:

where and are a vectors for the outcome and target treatments, respectively, and is an matrix of dummy variables for cluster identification. is the sample size, and is the number of clusters. This means that the odds ratios were conservatively estimated for the treated group in a particular cluster, in contrast to all untreated groups. Other interactions due to sampling bias, such as target treatment other treatments or target treatment covariates, were adjusted by inversely weighting the propensity score [S13, 14].

**Table S3. R packages used in the study**

| Packages | Version | Description |
| --- | --- | --- |
| mice | 3.14.0 | The mice package creates multiple imputations (replacement values) for multivariate missing data and is based on Fully Conditional Specification, where each incomplete variable is imputed by a separate model. The MICE algorithm can impute mixes of continuous, binary, unordered categorical and ordered categorical data.  <https://github.com/amices/mice>, <https://amices.org/mice/> |
| mitools | 2.4 | The mitools package performs analyses and combines results from multiple-imputation datasets. |
| survey | 4.1-1 | The survey package performs the following analyses: summary statistics, two-sample tests, rank tests, generalized linear models, cumulative link models, Cox models, log-linear models, general maximum pseudolikelihood estimation for multistage stratified, cluster-sampled, unequally weighted survey samples, variances by Taylor series linearisation or replicate weights, post-stratification, calibration, and raking, two-phase subsampling designs, graphics. PPS sampling without replacement, and small-area estimation. |
| dplyr | 1.2.2 | The dplyr package is a grammar of data manipulation, providing a consistent set of verbs that help you solve the most common data manipulation challenges.  <https://github.com/tidyverse/dplyr>, <https://dplyr.tidyverse.org/> |
| ggplot2 | 3.3.6 | The ggplot2 package is a system for declaratively creating graphics, based on The Grammar of Graphics.  <https://github.com/tidyverse/ggplot2>, <https://ggplot2.tidyverse.org/> |
| RColorBrewer | 1.1-3 | The RColorBrewer package provides color schemes for maps (and other graphics) designed by Cynthia Brewer as described at http://colorbrewer2.org. |
| Rcpp | 1.0.9 | The Rcpp package helps to integrate R and C++ via R functions and a (header-only) C++ library.  <https://github.com/RcppCore/Rcpp>, <https://dirk.eddelbuettel.com/code/rcpp.html> |
| uwot | 0.1.14 | The uwot package is an R implementation of the Uniform Manifold Approximation and Projection (UMAP) method for dimensionality reduction of McInnes et al. (2018). |
| parallel | 4.2.2 | The parallel package supports parallel computation, including forking (taken from package multicore), sockets (taken from package snow), and random-number generation. |
| doParallel | 1.0.17 | The doParallel package provides a parallel backend for the %dopar% function using the parallel package. |
| flexclust | 1.4-1 | The flexclust package performs the following cluster analyses: k-centroids cluster analysis supporting arbitrary distance measures and centroid computation, hard competitive learning, neural gas, and QT clustering. |
| clustMixType | 0.3-9 | The clustMixType package performs k-prototypes partitioning clustering for mixed variable-type data. |
| foreach | 1.5.2 | This foreach package provides support for the foreach looping construct. Foreach is an idiom that allows for iterating over elements in a collection, without the use of an explicit loop counter.  <https://github.com/RevolutionAnalytics/foreach> |
| lattice | 0.20-45 | The lattice add-on package is an implementation of Trellis graphics for R. It is a powerful and elegant high-level data visualization system with an emphasis on multivariate data..  <https://lattice.r-forge.r-project.org/> |
| stringr | 1.5.0 | The Strings play a big role in many data cleaning and preparation tasks. The stringr package provides a cohesive set of functions designed to make working with strings as easy as possible.  ]<https://stringr.tidyverse.org>, <https://github.com/tidyverse/stringr> |
| magrittr | 2.0.3 | The magrittr package offers a set of operators which make your code more readable by: structuring sequences of data operations left-to-right (as opposed to from the inside and out), avoiding nested function calls, minimizing the need for local variables and function definitions, and making it easy to add steps anywhere in the sequence of operations.  <https://magrittr.tidyverse.org>, <https://github.com/tidyverse/magrittr> |
| twang | 2.5 | The twang package provides functions for propensity score estimating and weighting, nonresponse weighting, and diagnosis of the weights. |

**Supplemental Results**

**Figure S1 Influence of the ratio of categorical variables to continuous variables on clustering performance in simulation studies.**


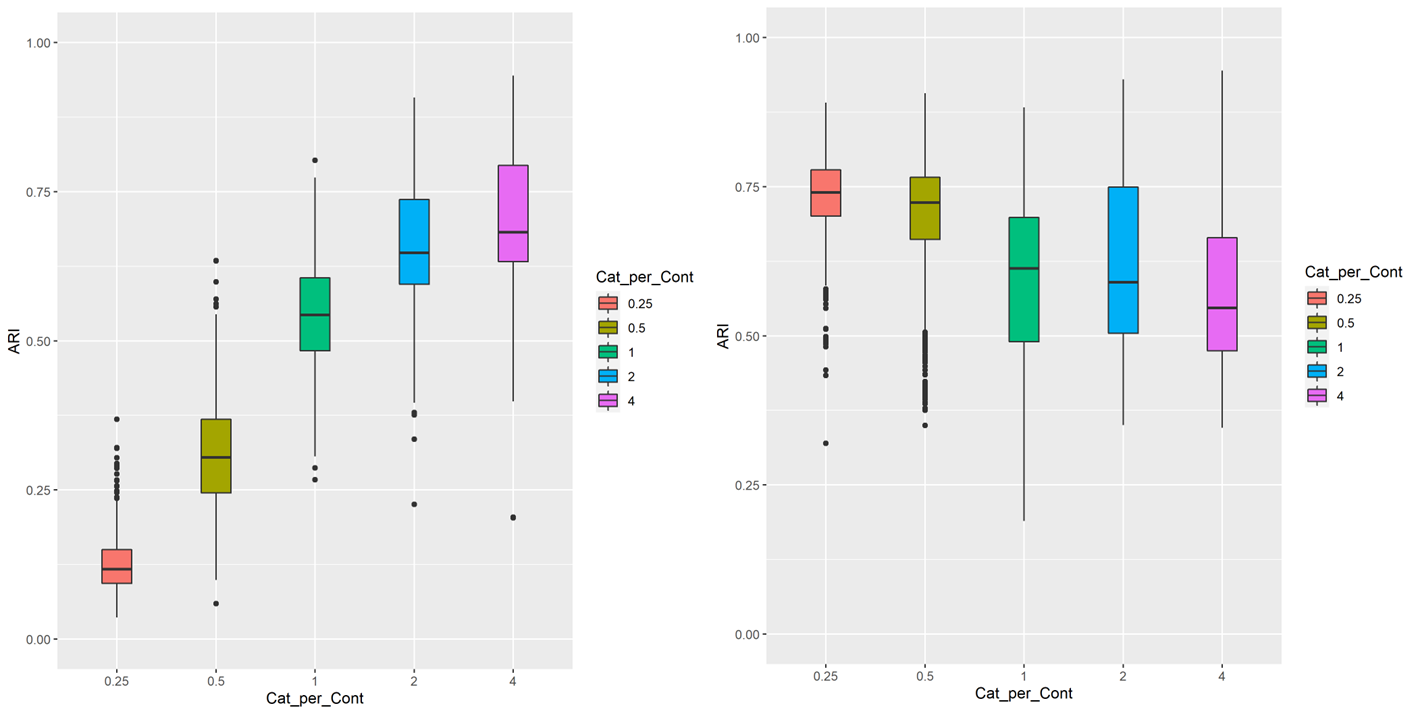


b

a

In k-UMAP (a), Adjusted Rand Indexes (ARI) increased as the ratio of categorical variables to continuous variables (Cat_per_Cont) increased. On the other hands, the opposite trend was observed in KAMILA (b).

| **Table S4. Missing data (no., %) across registries for variables** | | | | | | |
| --- | --- | --- | --- | --- | --- | --- |
| Registries | Derivation dataset | Tohoku Sepsis Registry | Forecast sepsis study | Validation dataset | JAAM  SPICE-ICU | JAAM MAESTRO |
| No. of patients | n = 1,756 | n = 573 | n = 1,183 | n = 672 | n = 494 | n = 178 |
| Age | 0 (0%) | 0 (0%) | 0 (0%) | 0 (0%) | 0 (0%) | 0 (0%) |
| Sex Male | 0 (0%) | 0 (0%) | 0 (0%) | 0 (0%) | 0 (0%) | 0 (0%) |
| BMI | 28 (1.6%) | 2 (0.3%) | 26 (2.2%) | 7 (1.0%) | 5 (1.0%) | 2 (1.1%) |
| Admission from ER | 2 (0.1%) | 0 (0%) | 2 (0.2%) | 0 (0%) | 0 (0%) | 0 (0%) |
| Past Medical history |  |  |  |  |  |  |
| Acute myocardial infarction | 0 (0%) | 0 (0%) | 0 (0%) | 0 (0%) | 0 (0%) | 0 (0%) |
| Acute Heart Failure | 0 (0%) | 0 (0%) | 0 (0%) | 0 (0%) | 0 (0%) | 0 (0%) |
| Peripheral Arterial Disease | 0 (0%) | 0 (0%) | 0 (0%) | 0 (0%) | 0 (0%) | 0 (0%) |
| Stroke | 0 (0%) | 0 (0%) | 0 (0%) | 0 (0%) | 0 (0%) | 0 (0%) |
| Chronic Lung Disease | 0 (0%) | 0 (0%) | 0 (0%) | 0 (0%) | 0 (0%) | 0 (0%) |
| Collagen Disease | 0 (0%) | 0 (0%) | 0 (0%) | 0 (0%) | 0 (0%) | 0 (0%) |
| Peptic Ulcer | 0 (0%) | 0 (0%) | 0 (0%) | 0 (0%) | 0 (0%) | 0 (0%) |
| Liver Disease | 0 (0%) | 0 (0%) | 0 (0%) | 0 (0%) | 0 (0%) | 0 (0%) |
| Diabetes | 0 (0%) | 0 (0%) | 0 (0%) | 0 (0%) | 0 (0%) | 0 (0%) |
| Chronic kidney disease | 0 (0%) | 0 (0%) | 0 (0%) | 0 (0%) | 0 (0%) | 0 (0%) |
| Malignancy | 0 (0%) | 0 (0%) | 0 (0%) | 0 (0%) | 0 (0%) | 0 (0%) |
| Metastatic Neoplasm | 0 (0%) | 0 (0%) | 0 (0%) | 1 (0.1%) | 0 (0%) | 0 (0%) |
| Medication |  |  |  |  |  |  |
| Steroid | 2 (0.1%) | 2 (0.3%) | 0 (0%) | - | - | 0 (0%) |
| Immunosuppressant | 2 (0.1%) | 2 (0.3%) | 0 (0%) | - | - | 0 (0%) |
| Statin | 2 (0.1%) | 2 (0.3%) | 0 (0%) | - | - | 0 (0%) |
| Antiplatelet | 2 (0.1%) | 2 (0.3%) | 0 (0%) | - | - | 0 (0%) |
| Beta Blocker | 2 (0.1%) | 2 (0.3%) | 0 (0%) | - | - | 0 (0%) |
| Radiotherapy | 2 (0.1%) | 3 (0.5%) | 0 (0%) | - | - | 0 (0%) |
| Vital signs, median (IQR) |  |  |  |  |  |  |
| Glasgow Coma Scale | 16 (0.9%) | 8 (1.4%) | 8 (0.7%) | 0 (0%) | 0 (0%) | 0 (0%) |
| Respiratory rate (/min) | 9 (0.5%) | 1 (0.2%) | 8 (0.7%) | 2 (0.3%) | 0 (0%) | 2 (1.1%) |
| Heart Rate (/min) | 4 (0.2%) | 0 (0%) | 4 (0.3%) | 1 (0.1%) | 1 (0.2%) | 0 (0%) |
| Systolic blood pressure (mmHg) | 27 (1.5%) | 0 (0%) | 27 (2.3%) | 4 (0.6%) | 1 (0.2%) | 3 (1.7%) |
| Diastolic blood pressure (mmHg) | 43 (2.4%) | 0 (0%) | 43 (3.6%) | 13 (1.9%) | 7 (1.4%) | 6 (3.4%) |
| Body Temperature (℃) | 41 (2.3%) | 0 (0%) | 41 (3.5%) | 3 (0.4%) | 1 (0.2%) | 2 (1.1%) |
| Blood test Data, median (IQR) |  |  |  |  |  |  |
| WBC (103/µL) | 0 (0%) | 0 (0%) | 0 (0%) | 0 (0%) | 0 (0%) | 0 (0%) |
| Hematocrit (%) | 7 (0.4%) | 1 (0.2%) | 6 (0.5%) | 2 (0.3%) | 1 (0.2%) | 1 (0.6%) |
| Platelets (104/µL) | 6 (0.3%) | 0 (0%) | 6 (0.5%) | 0 (0%) | 0 (0%) | 0 (0%) |
| Creatinine (mg/dL) | 10 (0.6%) | 2 (0.3%) | 8 (0.7%) | 0 (0%) | 0 (0%) | 0 (0%) |
| Bilirubin (mg/dL) | 18 (1.0%) | 1 (0.2%) | 17 (1.4%) | 2 (0.3%) | 1 (0.2%) | 1 (0.6%) |
| Glucose (mg/dL) | 33 (1.9%) | 7 (1.2%) | 26 (2.2%) | 11 (1.6%) | 3 (0.6%) | 8 (4.5%) |
| Sodium (mEq/L) | 7 (0.4%) | 0 (0%) | 7 (0.6%) | 0 (0%) | 0 (0%) | 0 (0%) |
| Potassium (mEq/L) | 7 (0.4%) | 0 (0%) | 7 (0.6%) | 0 (0%) | 0 (0%) | 0 (0%) |
| C-reactive protein (mg/dL) | 24 (1.4%) | 6 (1.0%) | 18 (1.5%) | 1 (0.1%) | 1 (0.2%) | 0 (0%) |
| Procalcitonin | 964 (54.9%) | 413 (72.1%) | 551 (46.6%) | - | - | 122 (68.5%) |
| PT-INR | 67 (3.8%) | 29 (5.1%) | 38 (3.2%) | 4 (0.6%) | 2 (0.4%) | 2 (1.1%) |
| APTT (sec) | 72 (4.1%) | 30 (5.2%) | 42 (3.6%) | - | - | - |
| FDP | 494 (28.1%) | 119 (20.8%) | 375 (31.7%) | 169 (25.1%) | 122 (24.7%) | 47 (26.4%) |
| D-dimer (µg/mL) | 356 (20.3%) | 56 (9.8%) | 300 (25.4%) | 80 (11.9 %) | 59 (11.9%) | 21 (11.8%) |
| Fibrinogen (mg/mL) | 364 (20.7%) | 138 (24.1%) | 226 (19.1%) | 73 (10.9) | 45 (9.1%) | 28 (15.7%) |
| pH | 84 (4.8%) | 7 (1.2%) | 77 (6.5%) | 7 (1.0%) | 5 (1.0%) | 2 (1.1%) |
| PaCO2 (mmHg) | 118 (6.7%) | 38 (6.6%) | 80 (6.8%) | 8 (1.2%) | 5 (1.0%) | 3 (1.7%) |
| PaO2 (mmHg) | 132 (7.5%) | 41 (7.2%) | 91 (7.6%) | 12 (1.8%) | 6 (1.2%) | 6 (3.4%) |
| Base excess (mEq/L) | 92 (5.2%) | 11 (1.9%) | 81 (6.8%) | - | - | - |
| Lactate (mmol/L) | 45 (2.6%) | 9 (1.6%) | 36 (3.0%) | 8 (1.2%) | 6 (1.2%) | 2 (1.1%) |
| SOFA score, median (IQR) | 236 (13.4%) | 53 (9.2%) | 183 (15.5%) | 26 (3.9%) | 0 (0%) | 26 (14.6%) |
| Respiration | 133 (7.6%) | 35 (6.1%) | 98 (8.3%) | 34 (5.1%) | 8 (1.6%) | 26 (14.6%) |
| Coagulation | 0 (0%) | 0 (0%) | 0 (0%) | 0 (0%) | 0 (0%) | 0 (0%) |
| Liver | 18 (1.0%) | 1 (0.2%) | 17 (1.4%) | 2 (0.3%) | 1 (0.2%) | 1 (0.6%) |
| Cardiovascular | 20 (1.1%) | 8 (1.4%) | 12 (1.0%) | 0 (0%) | 0 (0%) | 0 (0%) |
| Central Nervous System | 244 (13.9%) | 236 (41.2%) | 8 (0.7%) | 0 (0%) | 0 (0%) | 0 (0%) |
| Renal | 125 (7.1%) | 2 (0.3%) | 123 (10.4%) | 0 (0%) | 0 (0%) | 0 (0%) |
| APACHE II score, median (IQR) | 219 (12.5%) | 57 (9.9%) | 162 (13.7%) | 37 (5.5%) | 0 (0%) | 37 (20.8%) |
| SIRS, median (IQR) | 43 (2.4%) | 0 (0%) | 43 (3.6%) | 5 (0.7%) | 0 (0%) | 5 (2.8%) |
| JAAM DIC score, median (IQR) | 200 (11.4%) | 31 (5.4%) | 169 (14.3%) | 11 (1.6%) | 0 (0%) | 11 (6.2%) |
| Management |  |  |  |  |  |  |
| Noradrenaline | 2 (0.1%) | 2 (0.3%) | 0 (0%) | - | - | - |
| Vasopressin | 2 (0.1%) | 2 (0.3%) | 0 (0%) | - | - | - |
| Corticosteroids | 43 (2.4%) | 1 (0.2%) | 42 (3.6%) | - | - | 0 (0%) |
| Thrombomodulin | 46 (2.6%) | 4 (0.7%) | 42 (3.6%) | - | - | 0 (0%) |
| Antithrombin III | 45 (2.6%) | 4 (0.7%) | 41 (3.5%) | - | - | 0 (0%) |
| Immunoglobulin | 50 (2.8%) | 5 (0.9%) | 45 (3.8%) | - | - | 0 (0%) |
| PMX-DHP | 40 (2.3%) | 3 (0.5%) | 37 (3.1%) | - | - | 0 (0%) |
| *Abbreviation:* SD = standard deviation, IQR = interquartile range, ER = emergency room., APTT = Activated partial thromboplastin time  SOFA score = Sequential Organ Failure Assessment score, APACHE II score = Acute Physiology and Chronic Health Evaluation II score, SIRS = Systemic Inflammatory Response Syndrome, JAAM DIC score = Japanese Association for Acute Medicine Disseminated Intravascular Coagulation score. PMX-DHP = polymyxin B-immobilized fiber column hemoperfusion | | | | | | |

**Figure S2. Density plot comparing observed versus imputed data.**


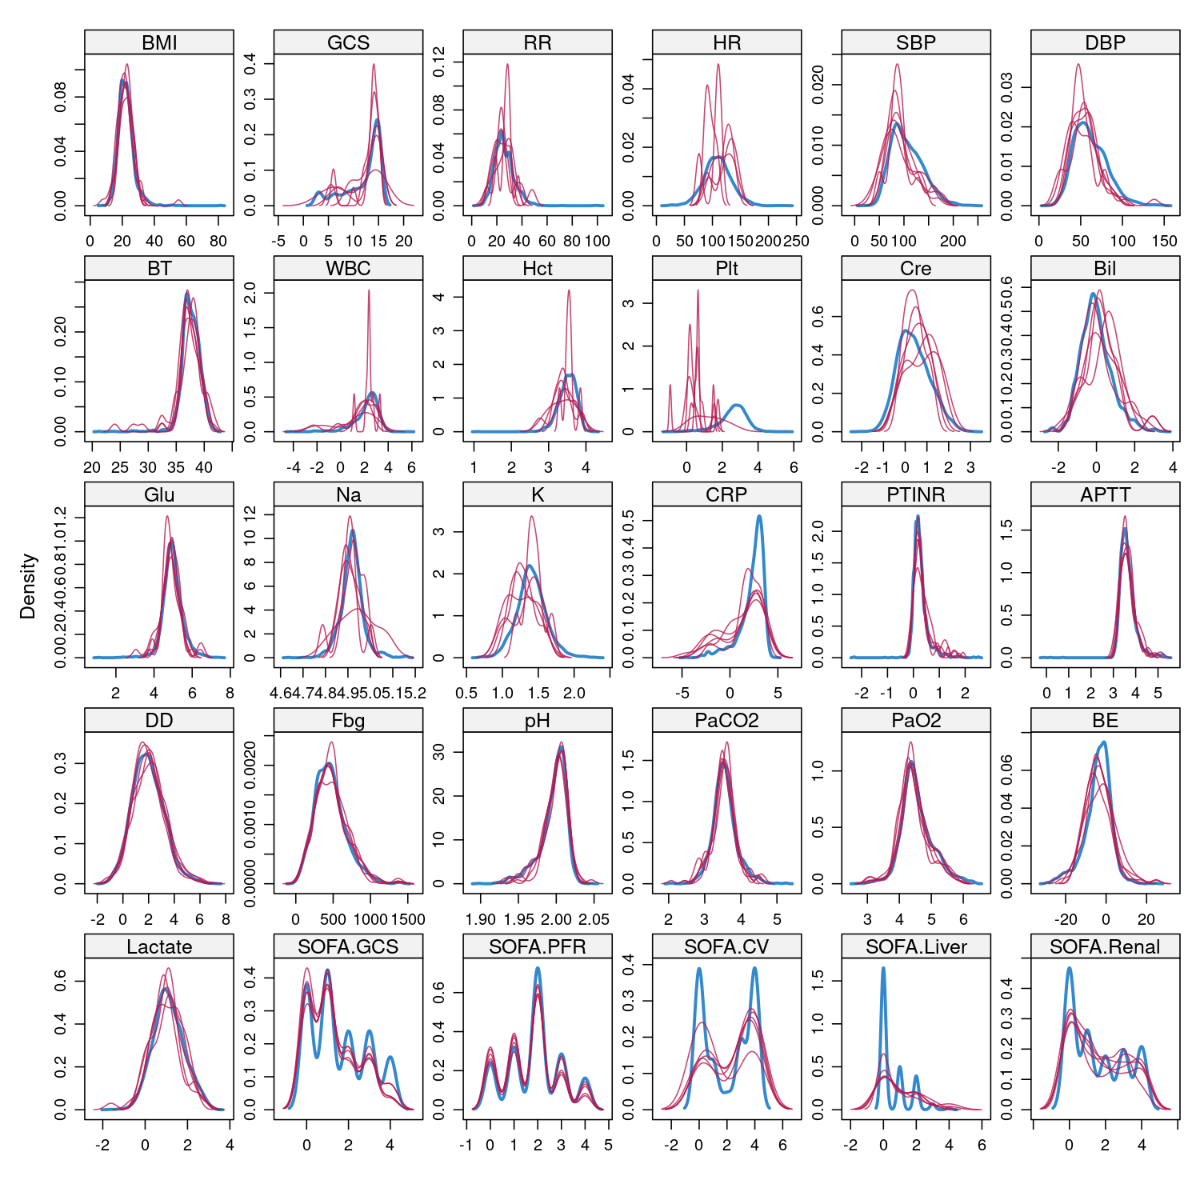


A density plot is a data visualization technique that shows the distribution of a continuous numerical variable, offering a smoothed alternative to histogram. It helps visualize the shape, spread, and skewness of the data. In the plot, the red line represents imputed values, while the blue line represents observed values.

*Abbreviation:* BMI = Body Mass Index, GCS = Glasgow Coma Scale, RR = Respiratory rate, HR = Heart Rate, SBP = Systolic blood pressure, DBP = Diastolic blood pressure, BT = Body Temperature, WBC = White blood cell, Hct = Hematocrit, Plt = Platelet, Cre = creatinine, Bil = Total bilirubin, Glu = glucose, Na = sodium, K = potassium, CRP = C-reactive protein, PT-INR = Prothrombin Time-International Normalized Ratio, APTT = activated partial thromboplastin time, DD = D-dimer, Fbg = fibrinogen, BE = base excess, SOFA.PFR = Respiratory component of the SOFA score, SOFA.Coag = Coagulation component of the SOFA score, SOFA.Liver = Hepatic component of the SOFA score, SOFA.CV = Cardiovascular component of the SOFA score, SOFA.GCS = Central Nervous System component of the SOFA score, SOFA.Renal = Renal component of the SOFA score

**Figure S3. Independence of variable introduced in analysis.**


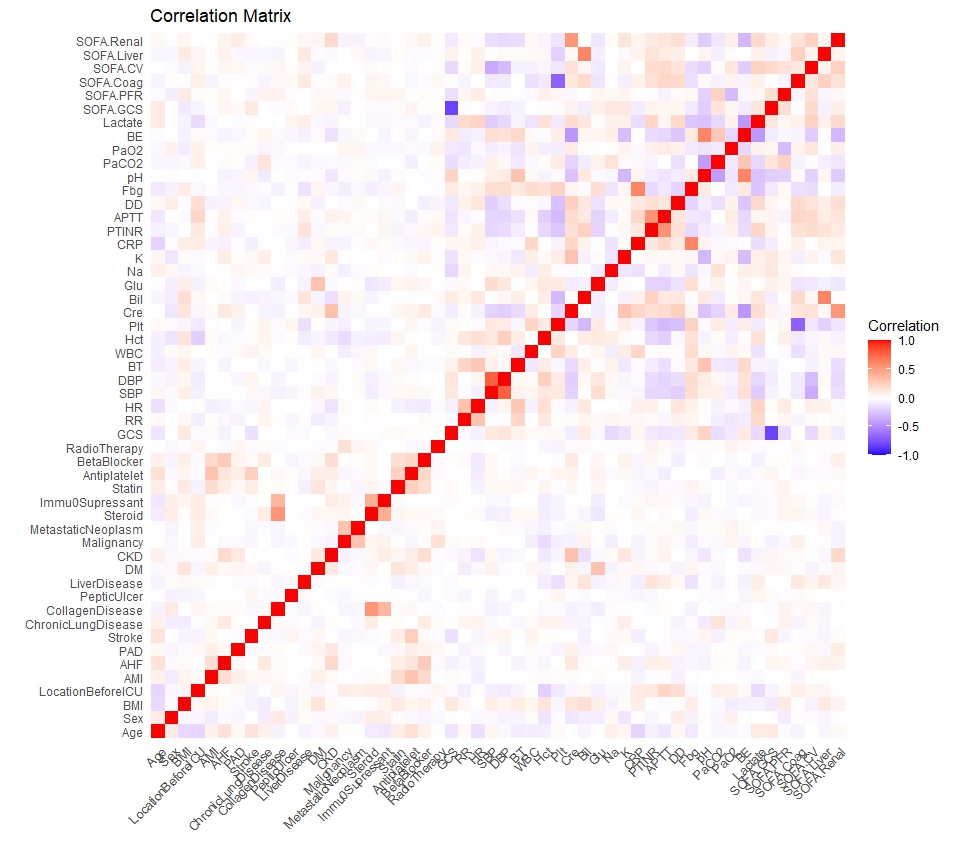


Positive correlations are displayed in red and negative correlations in blue, and the color intensity is proportional to the correlation coefficient.

*Abbreviation:* BMI = Body Mass Index, AMI = acute myocardial infarction, AHF = acute heart failure, PAD = peripheral arterial disease, DM = diabetes, CKD = chronic kidney disease, GCS = Glasgow Coma Scale, RR = Respiratory rate, HR = Heart Rate, SBP = Systolic blood pressure, DBP = Diastolic blood pressure, BT = Body Temperature, WBC = White blood cell, Hct = Hematocrit, Plt = Platelet, Cre = creatinine, Bil = Total bilirubin, Glu = glucose, Na = sodium, K = potassium, CRP = C-reactive protein, PT-INR = Prothrombin Time-International Normalized Ratio, APTT = activated partial thromboplastin time, DD = D-dimer, Fbg = fibrinogen, BE = base excess, SOFA.PFR = Respiratory component of the SOFA score, SOFA.Coag = Coagulation component of the SOFA score, SOFA.Liver = Hepatic component of the SOFA score, SOFA.CV = Cardiovascular component of the SOFA score, SOFA.GCS = Central Nervous System component of the SOFA score, SOFA.Renal = Renal component of the SOFA score

**Figure S4. Adjusted Rand Indexes between clustering methods at cluster number 2**


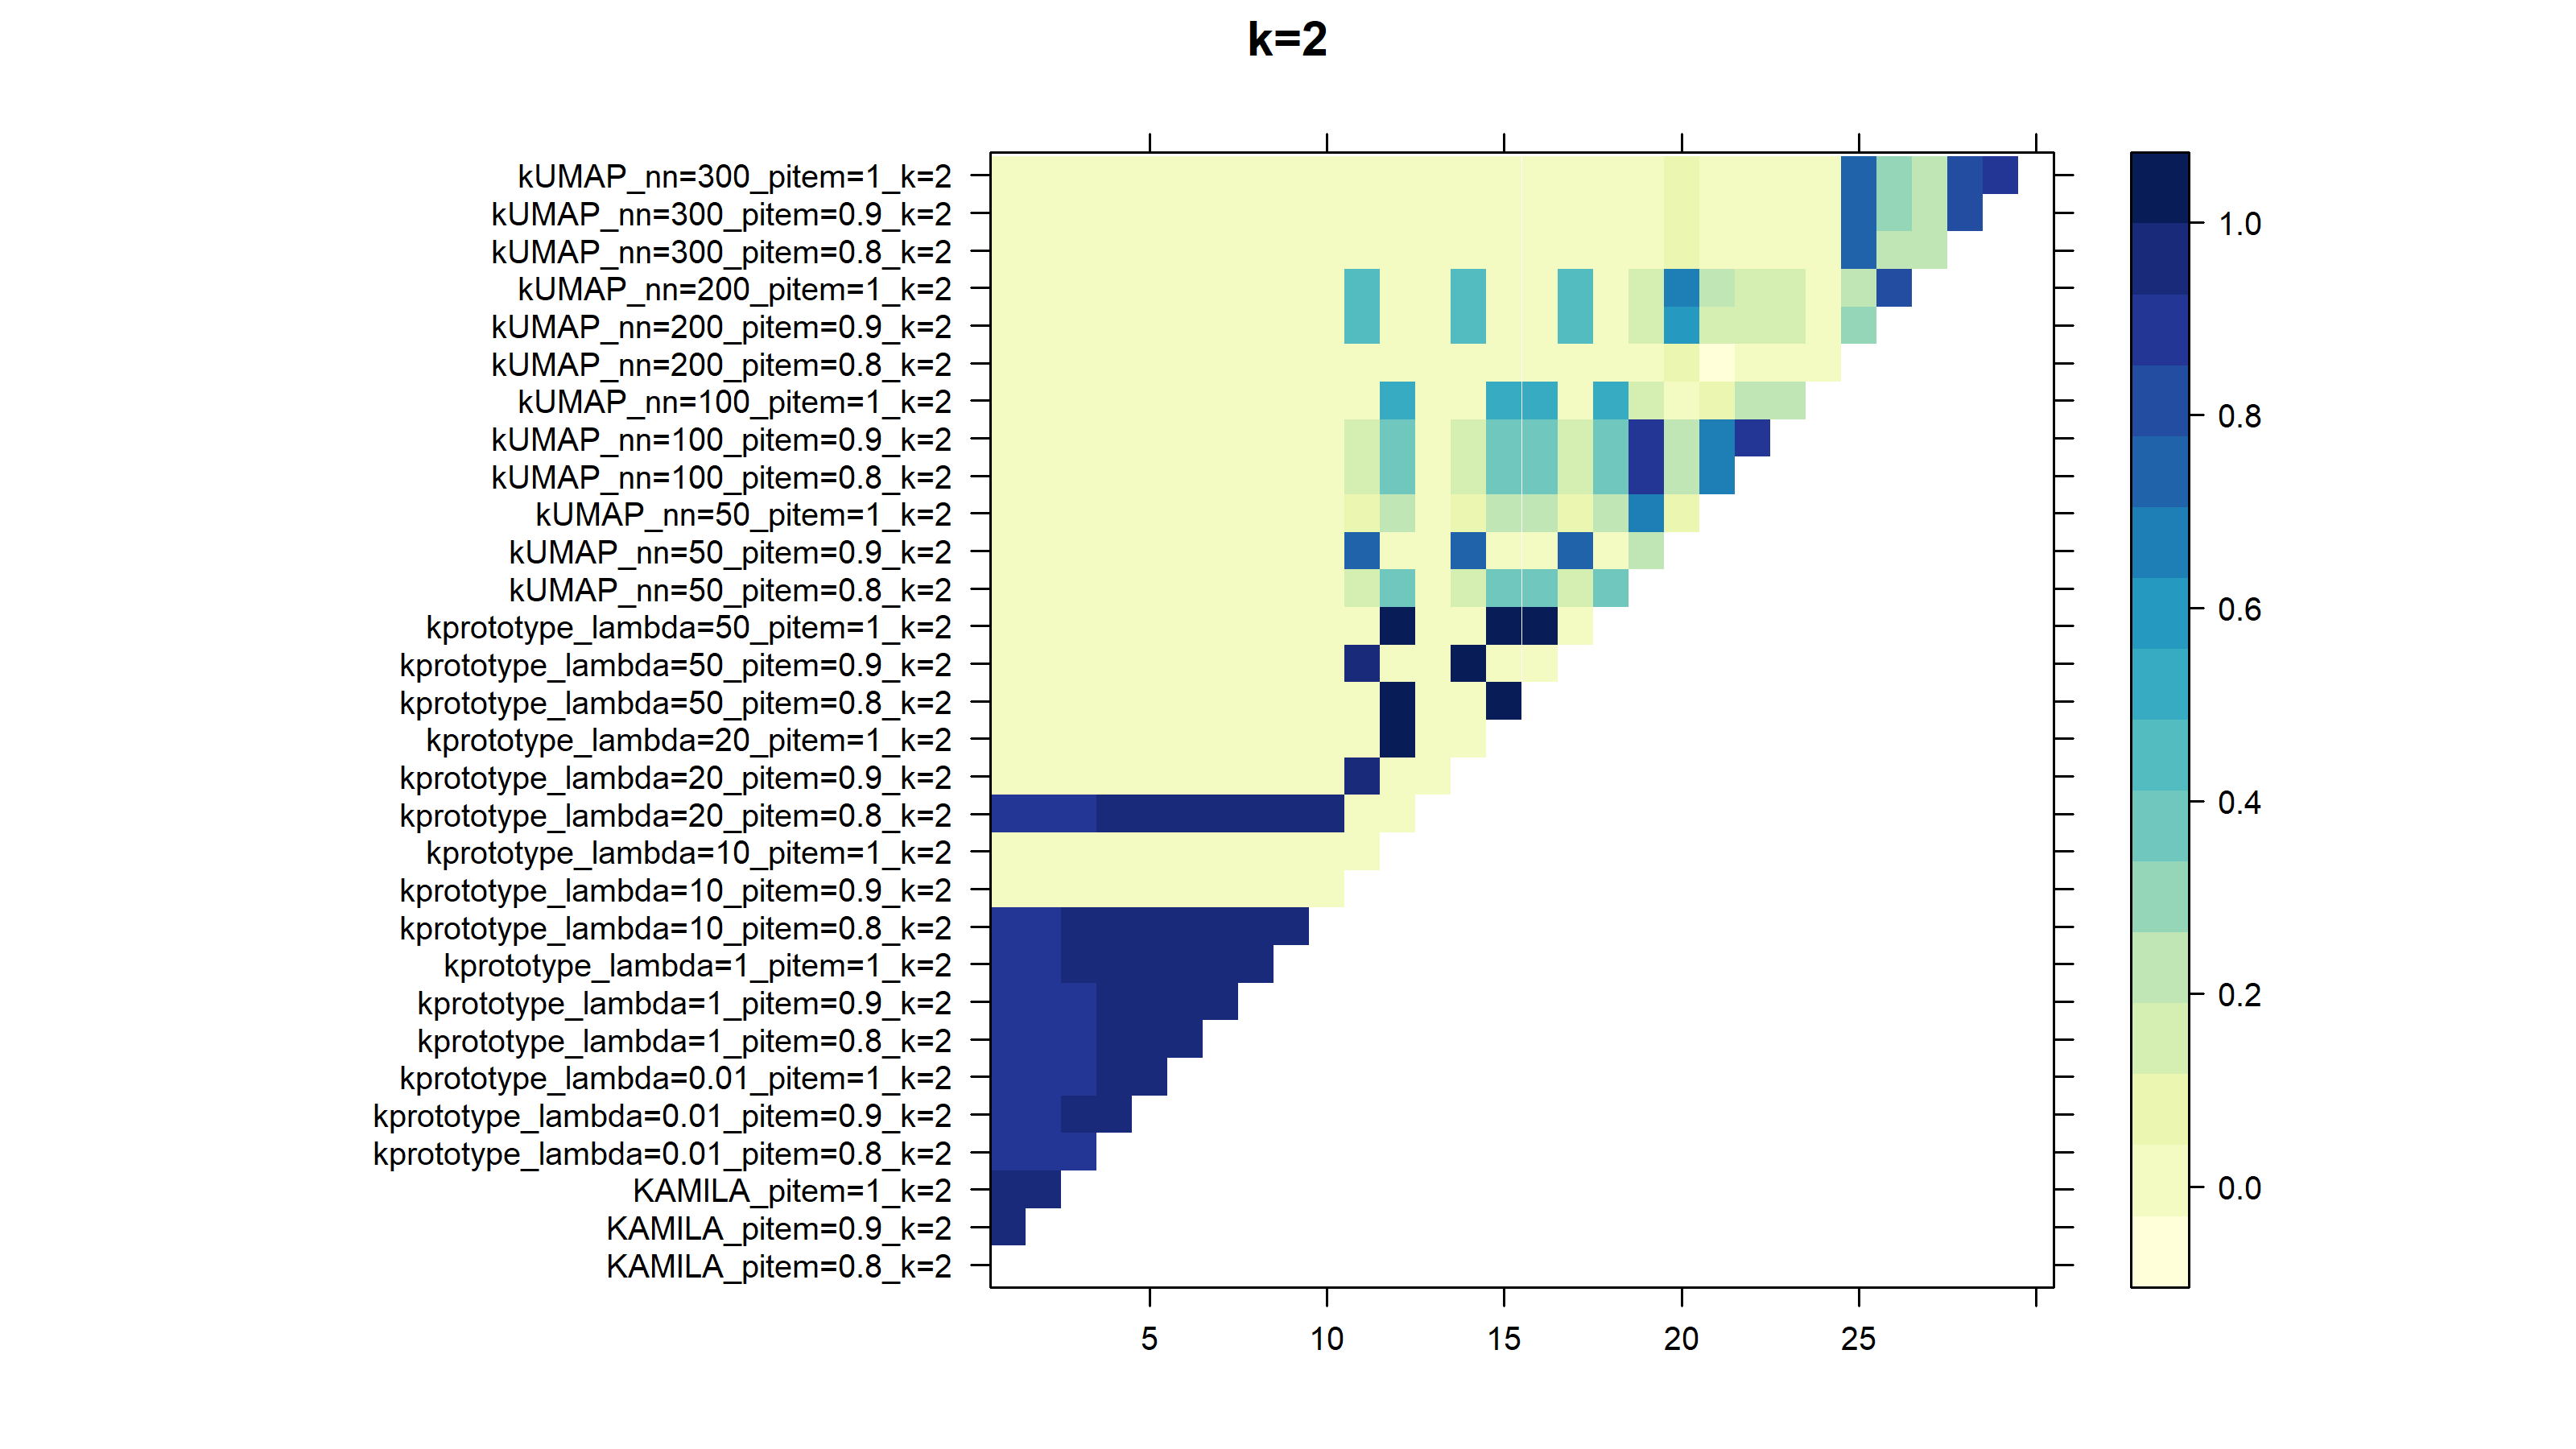


The blue color intensity is proportional to the Adjusted Rand Indexes.

*Abbreviation:* nn = number of neighbors, KAMILA: KAymeans for MIxed LArge data

**Figure S5. Adjusted Rand Indexes between clustering methods at cluster number 3**


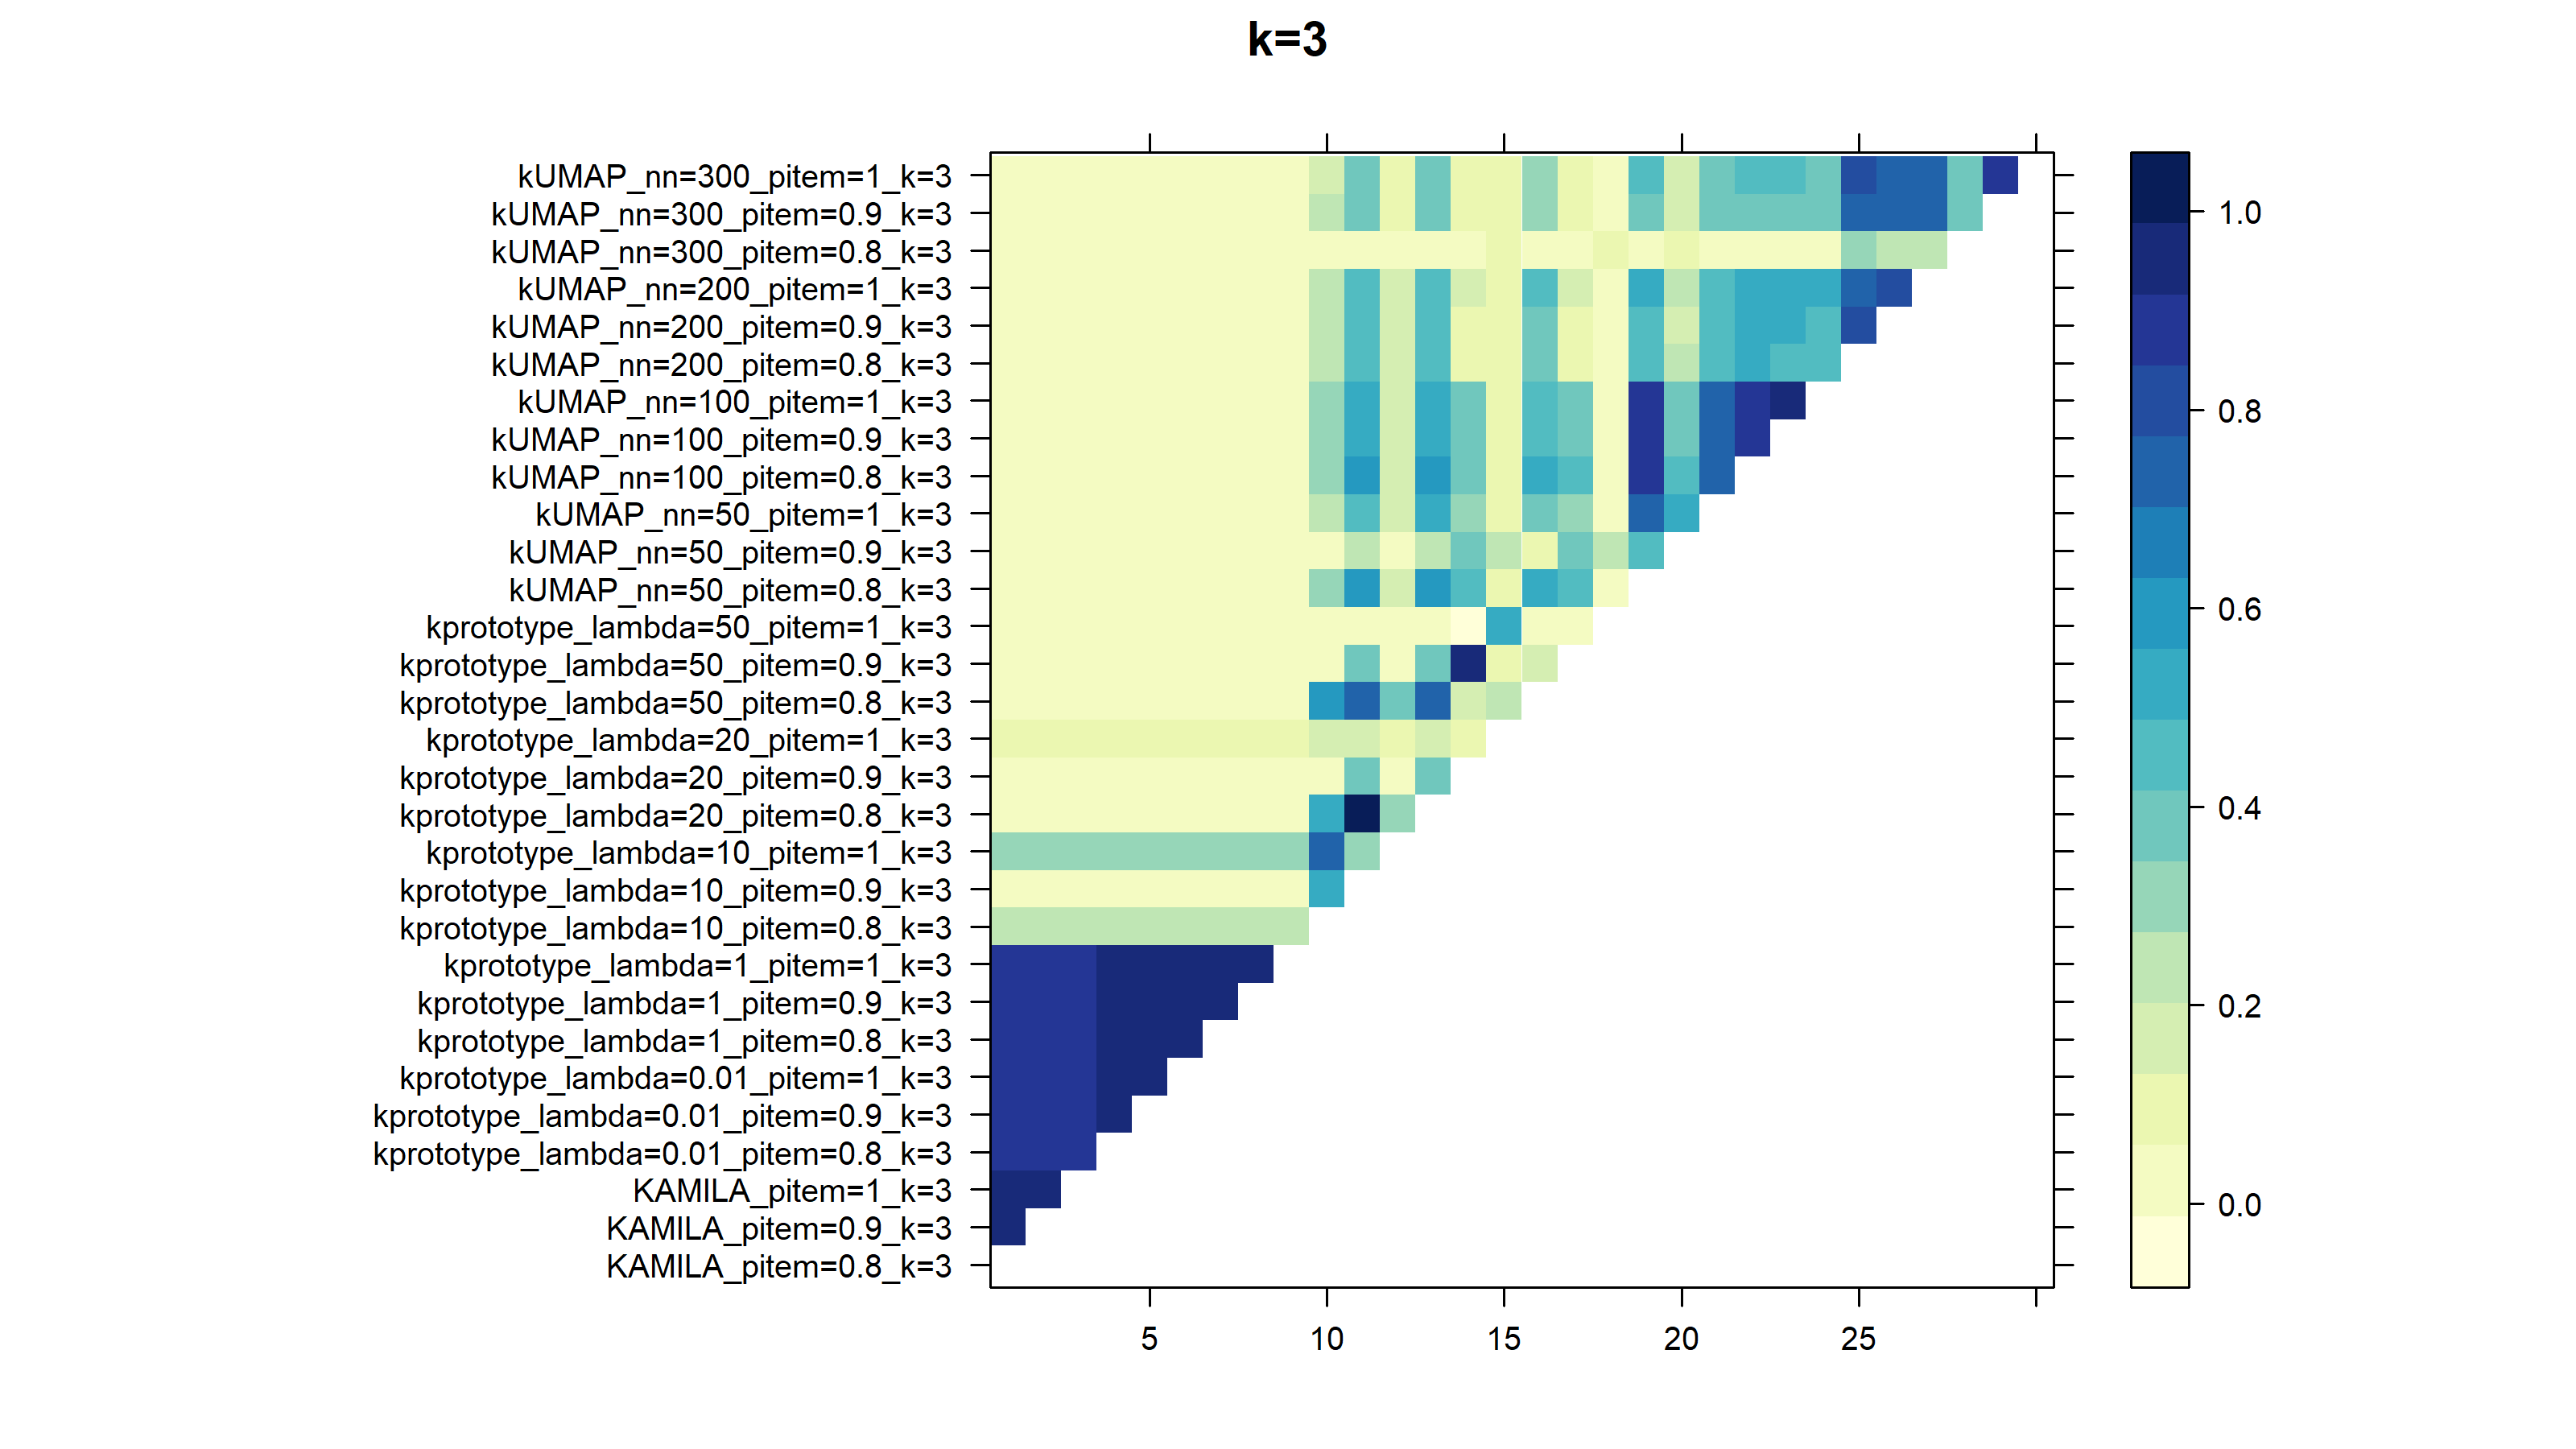


The blue color intensity is proportional to the Adjusted Rand Indexes.

*Abbreviation:* nn = number of neighbors, KAMILA: KAymeans for MIxed LArge data

**Figure S6. Adjusted Rand Indexes between clustering methods at cluster number 4**


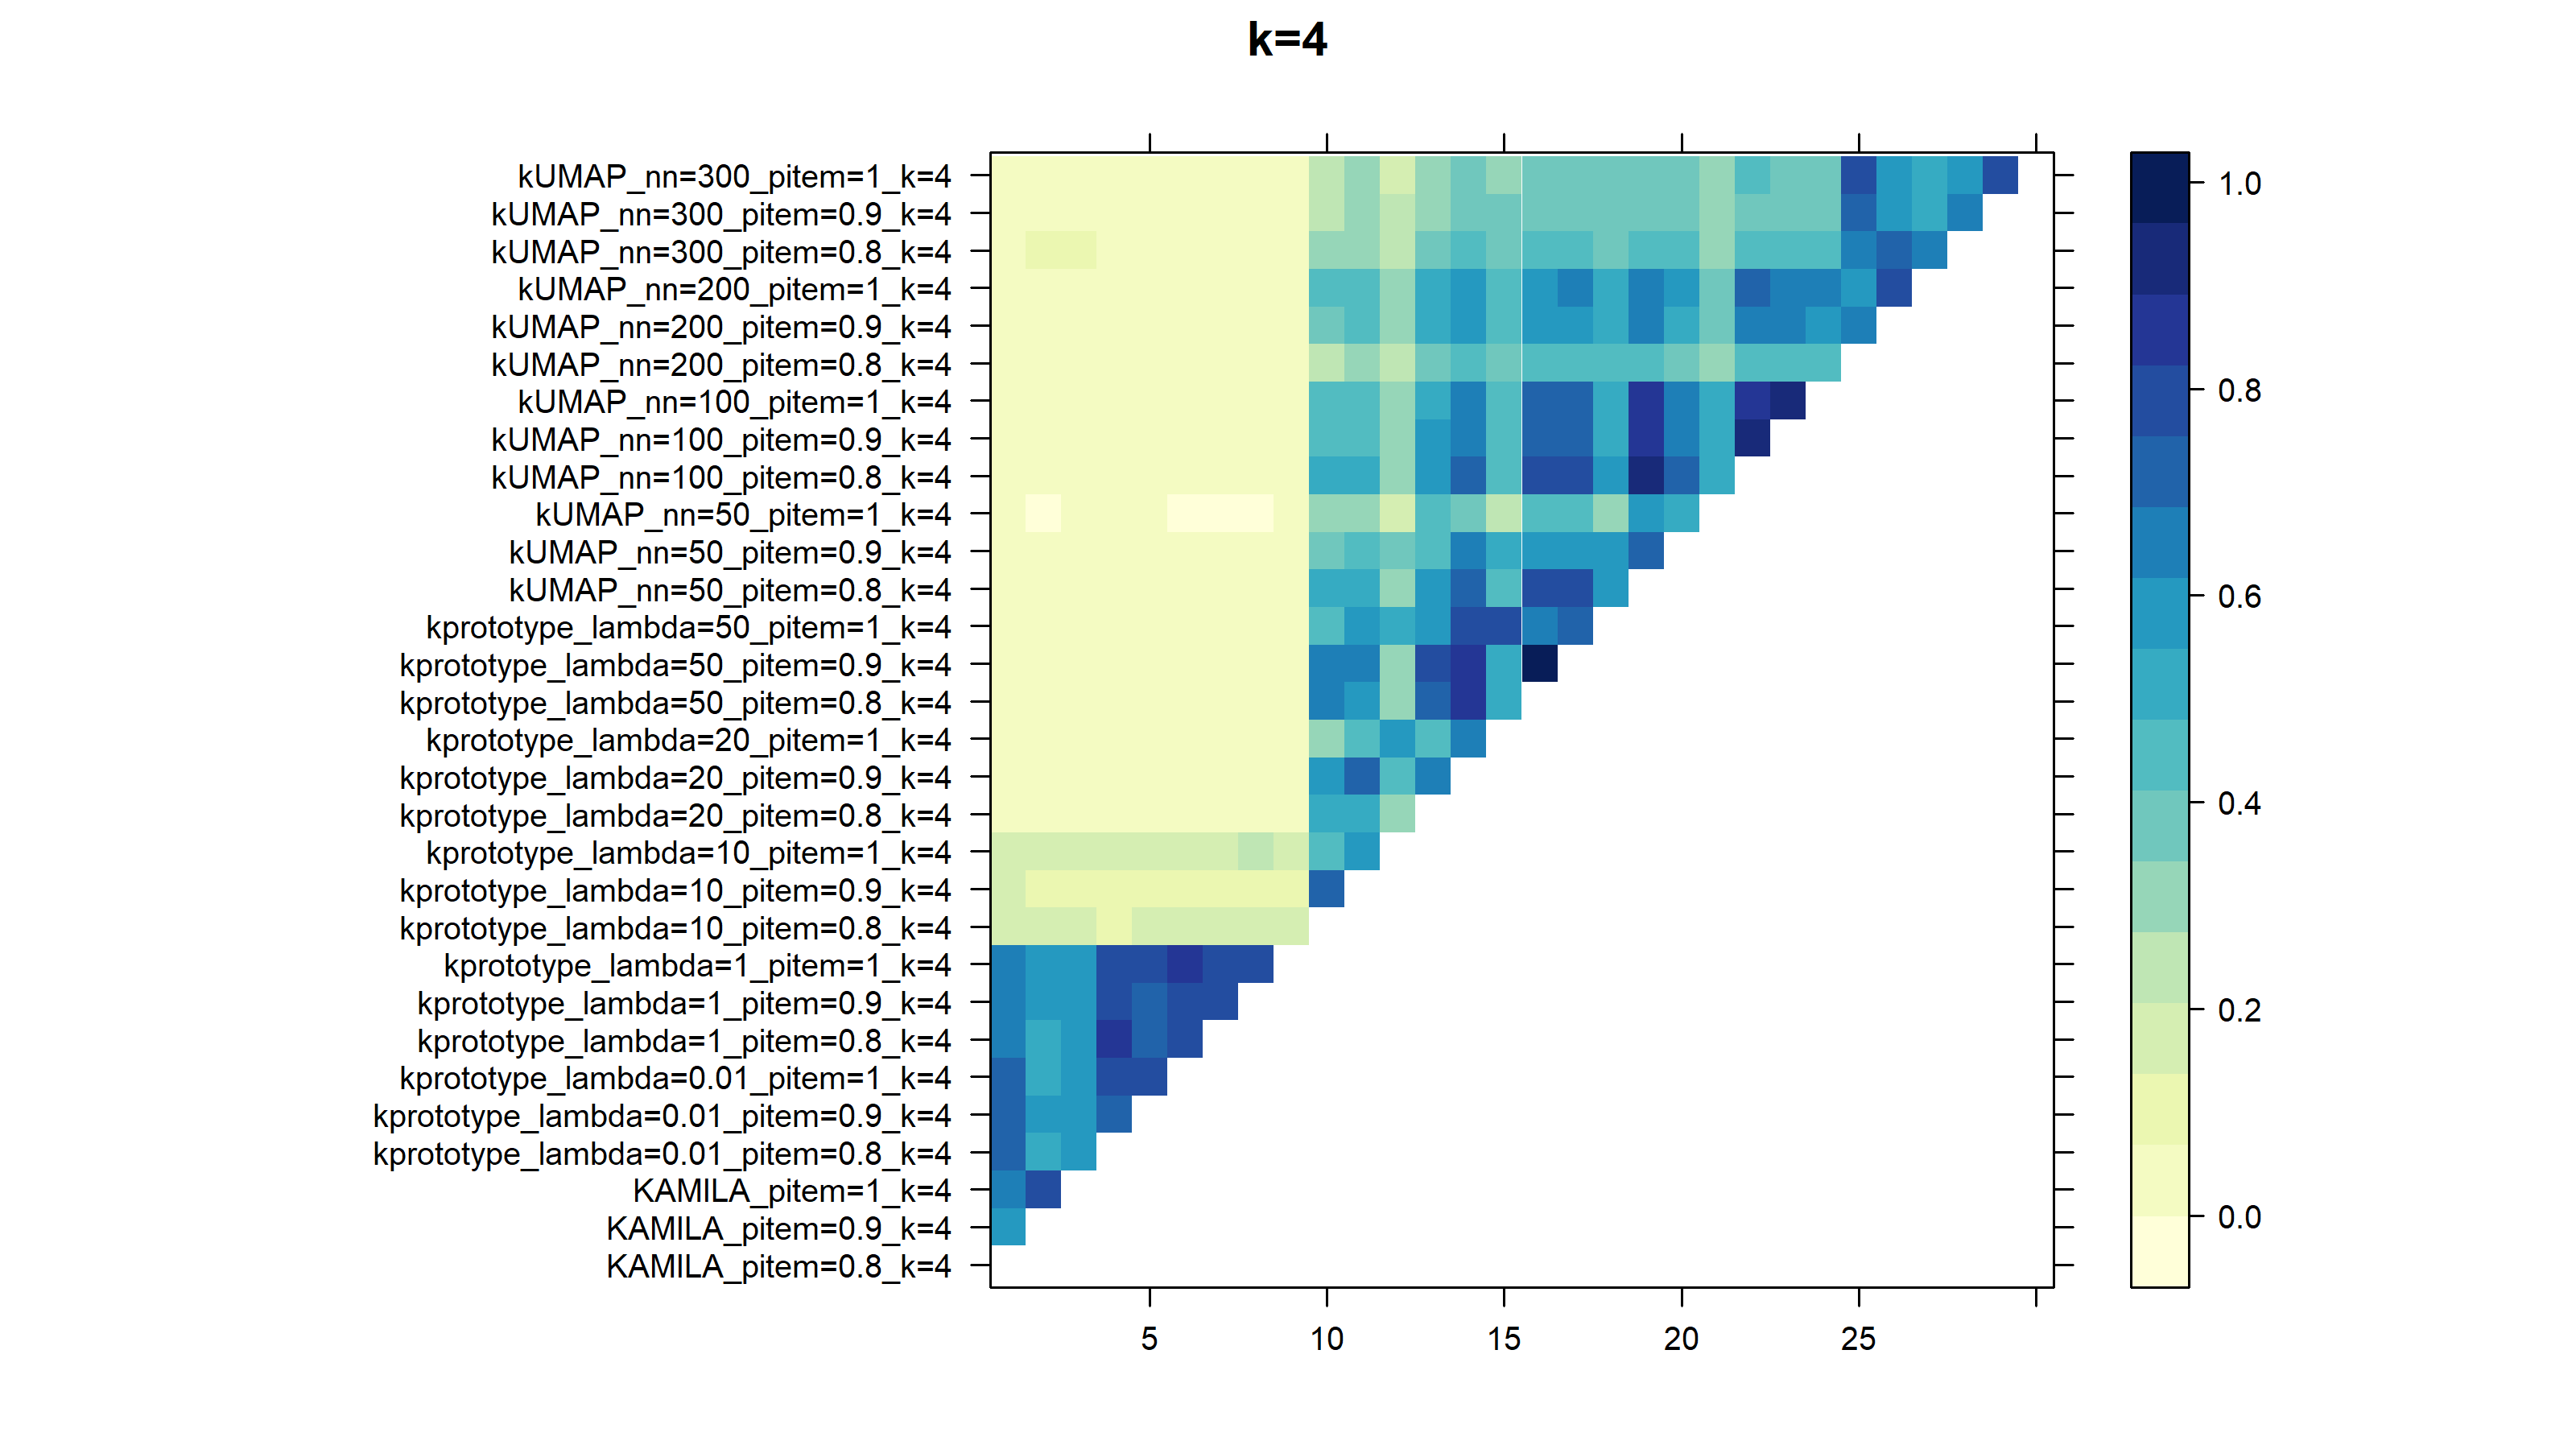


The blue color intensity is proportional to the Adjusted Rand Indexes.

*Abbreviation:* nn = number of neighbors, KAMILA: KAymeans for MIxed LArge data

**Figure S7. Adjusted Rand Indexes between clustering methods at cluster number 5**


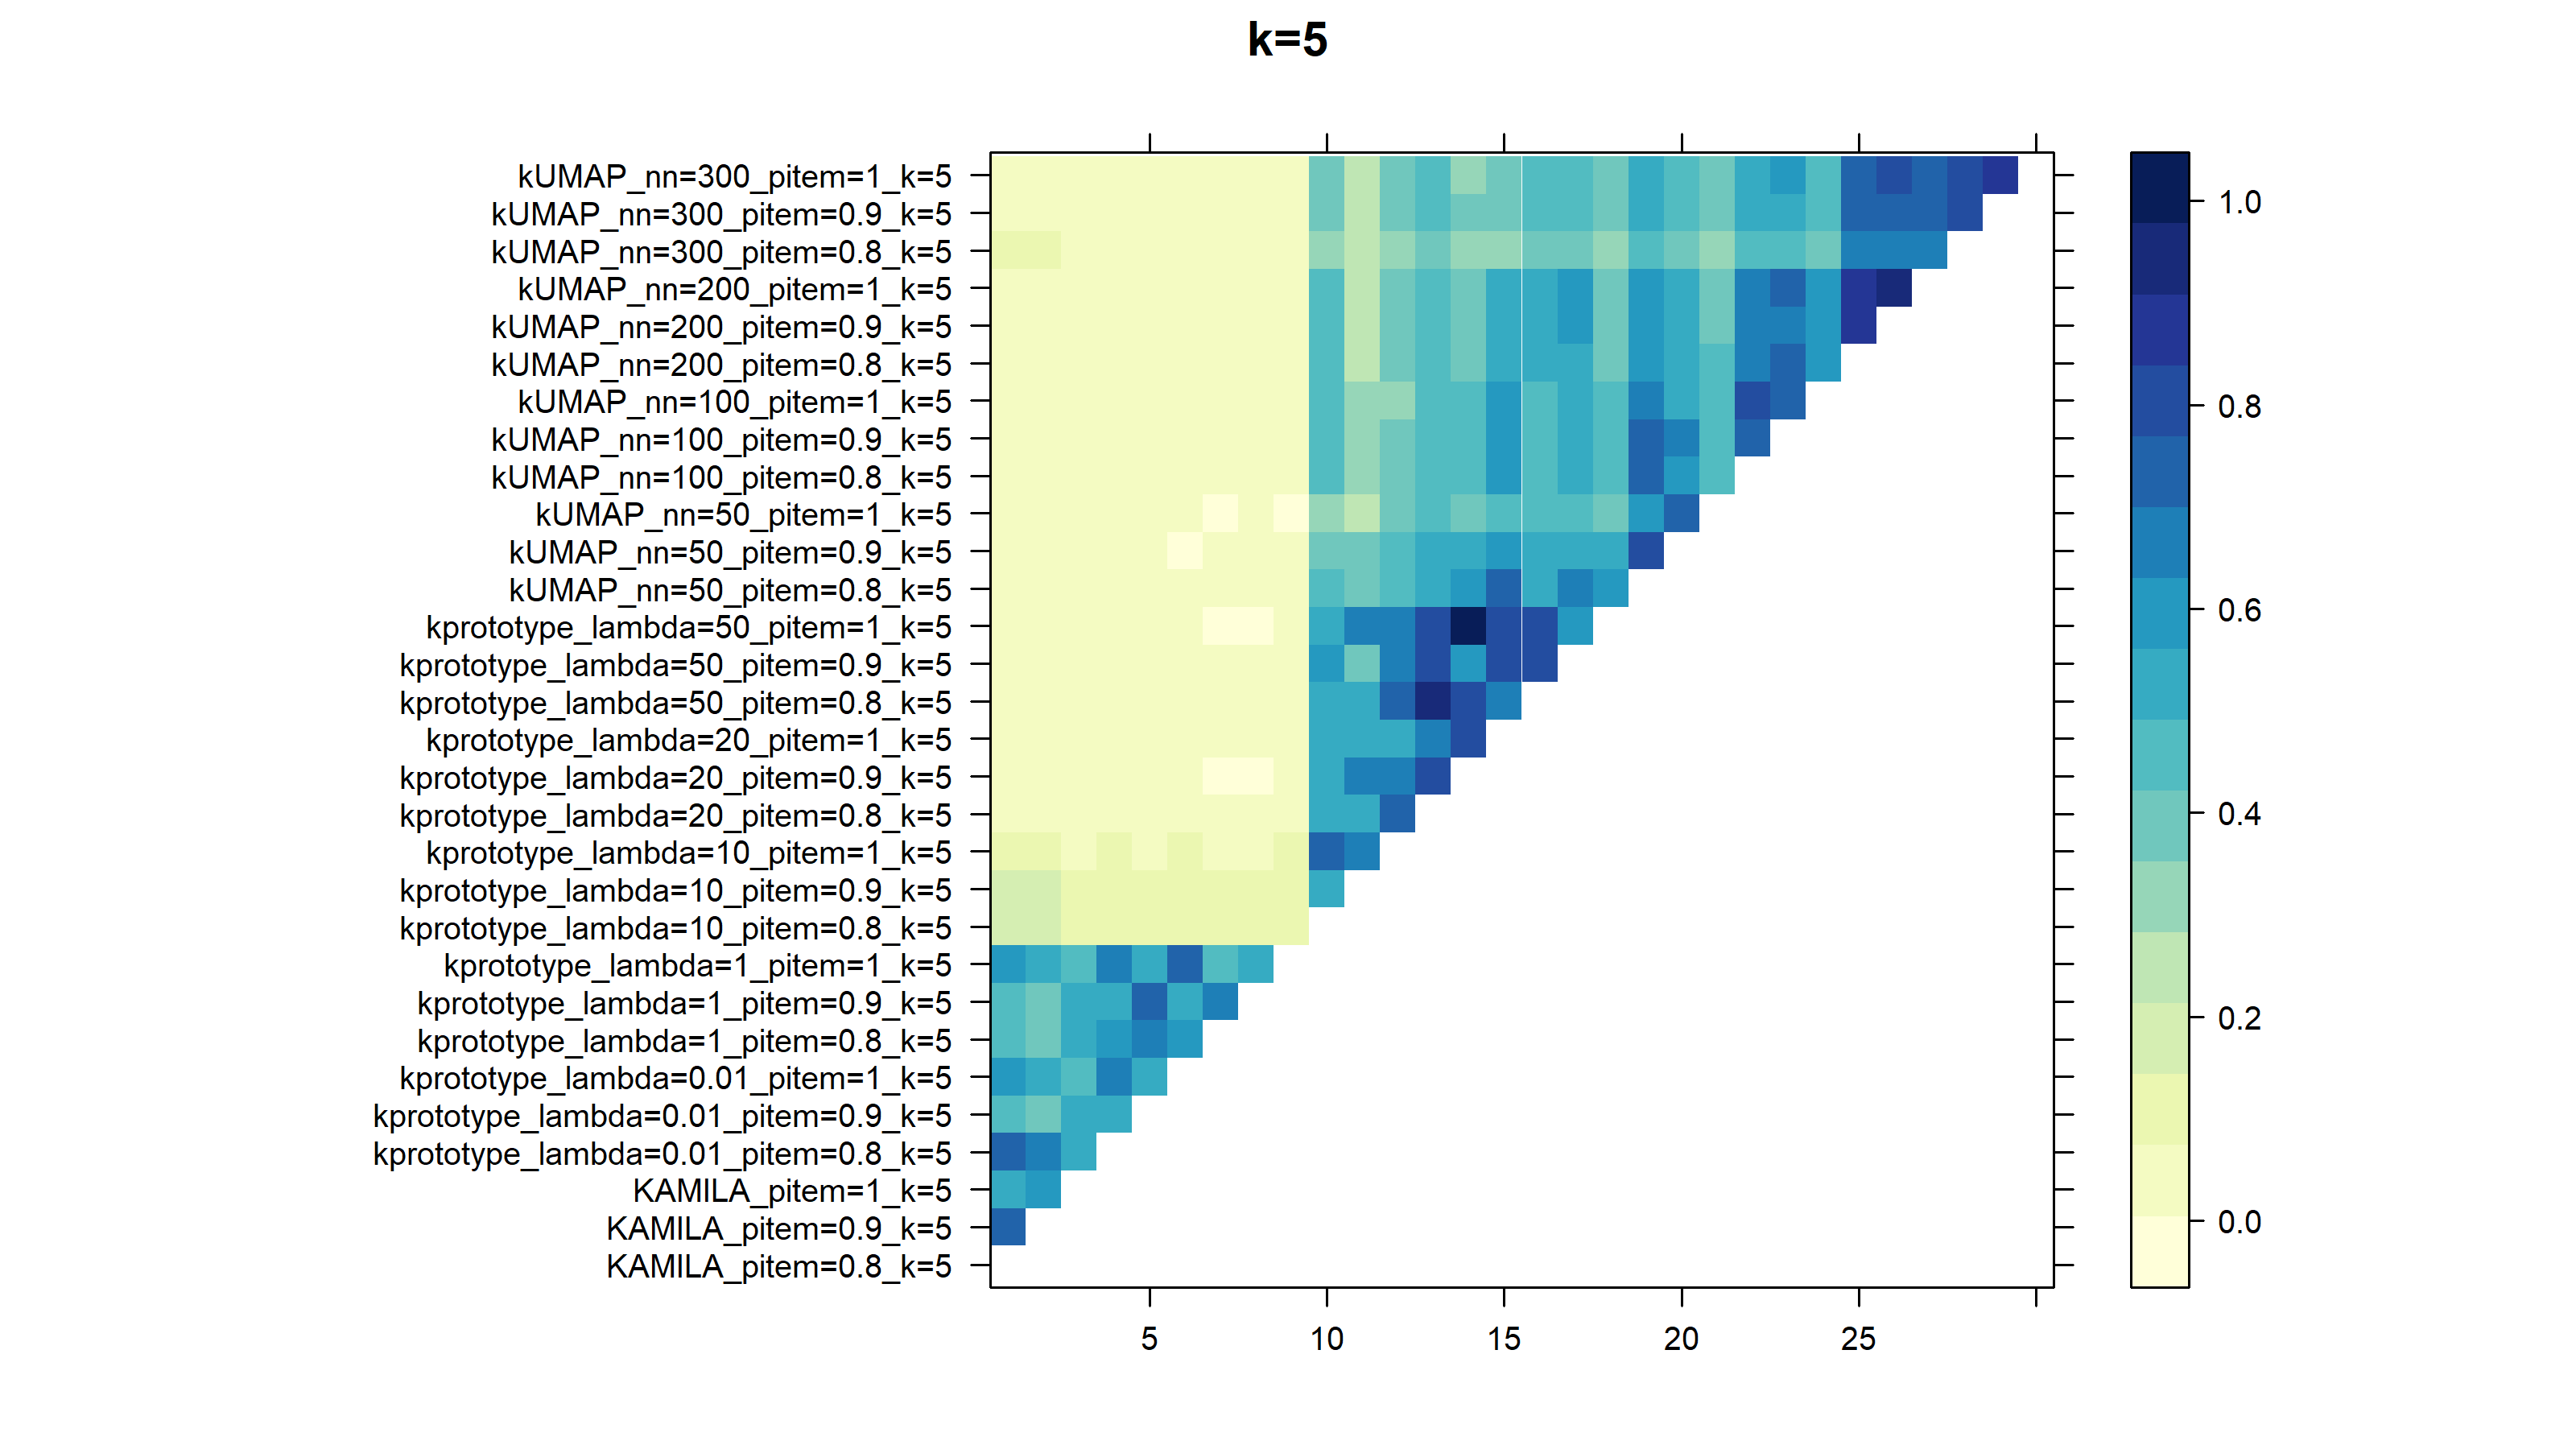


The blue color intensity is proportional to the Adjusted Rand Indexes.

*Aabbreviation:* nn = number of neighbors, KAMILA: KAymeans for MIxed LArge data

**Figure S8 Adjusted Rand Indexes between clustering methods at cluster number 6**


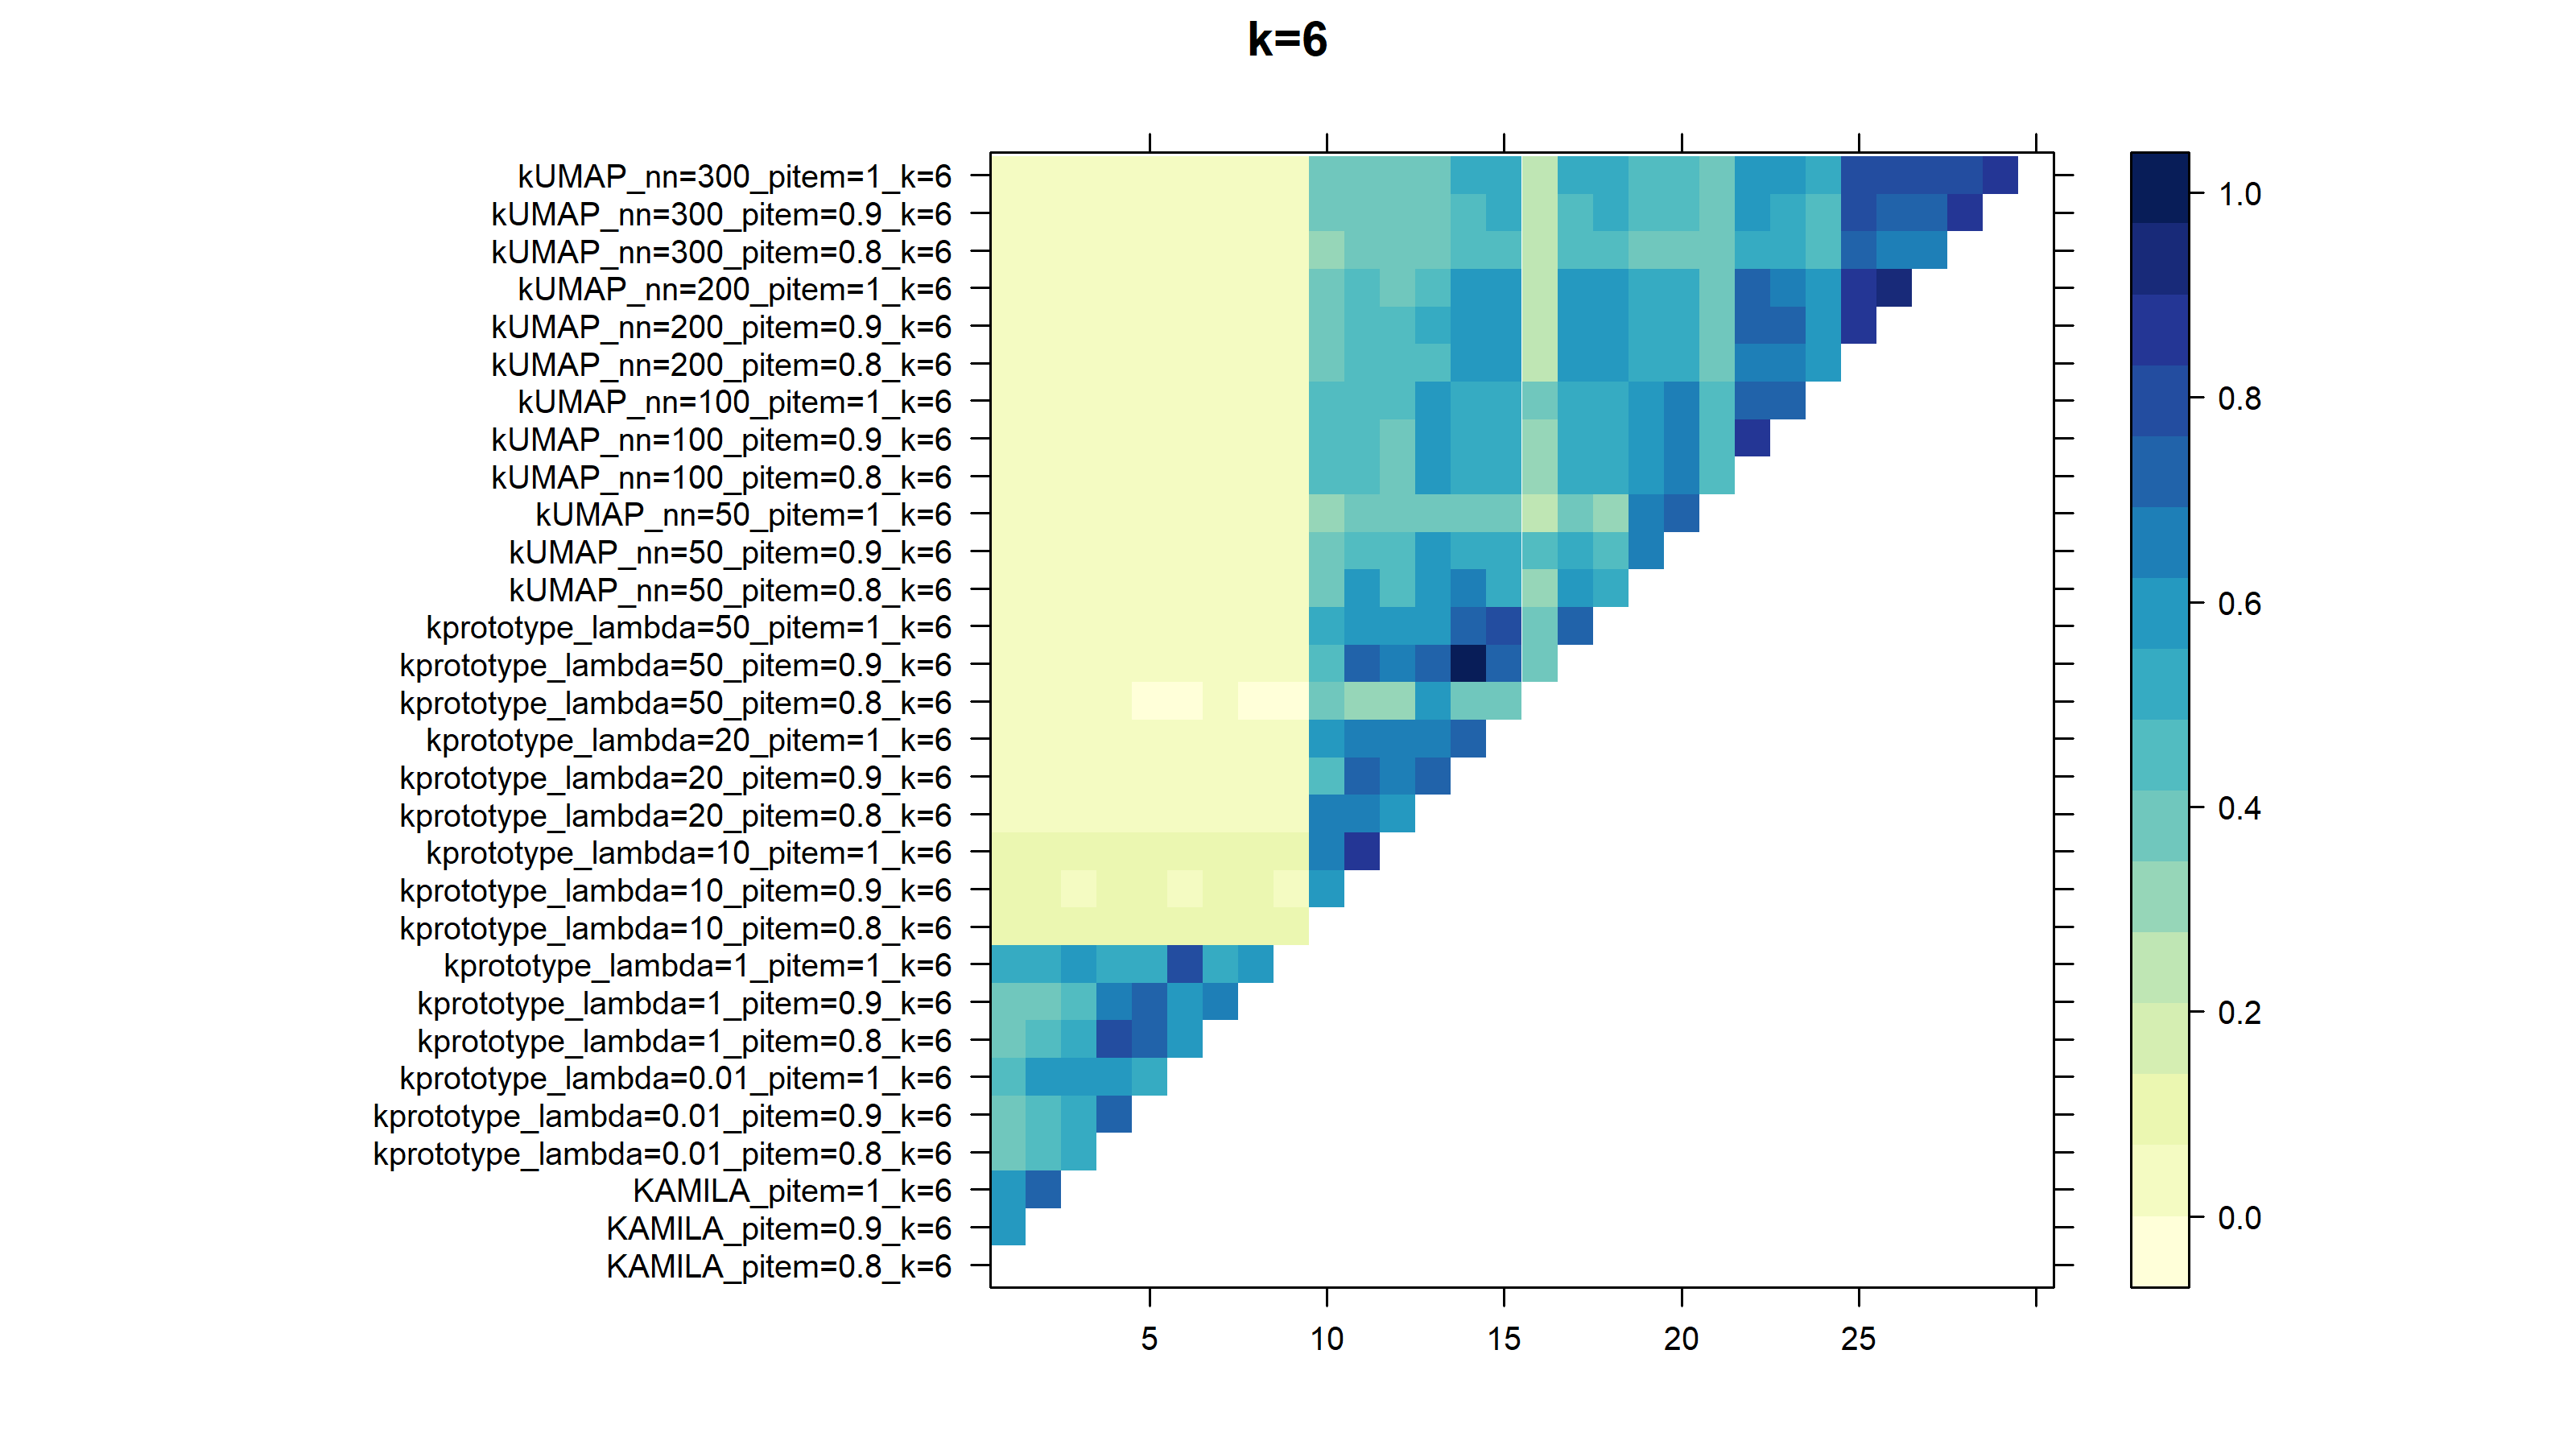


The blue color intensity is proportional to the Adjusted Rand Indexes.

*Abbreviation:* nn = number of neighbors, KAMILA: KAymeans for MIxed LArge data

**Figure S9 Adjusted Rand Indexes between clustering methods at cluster number 7**


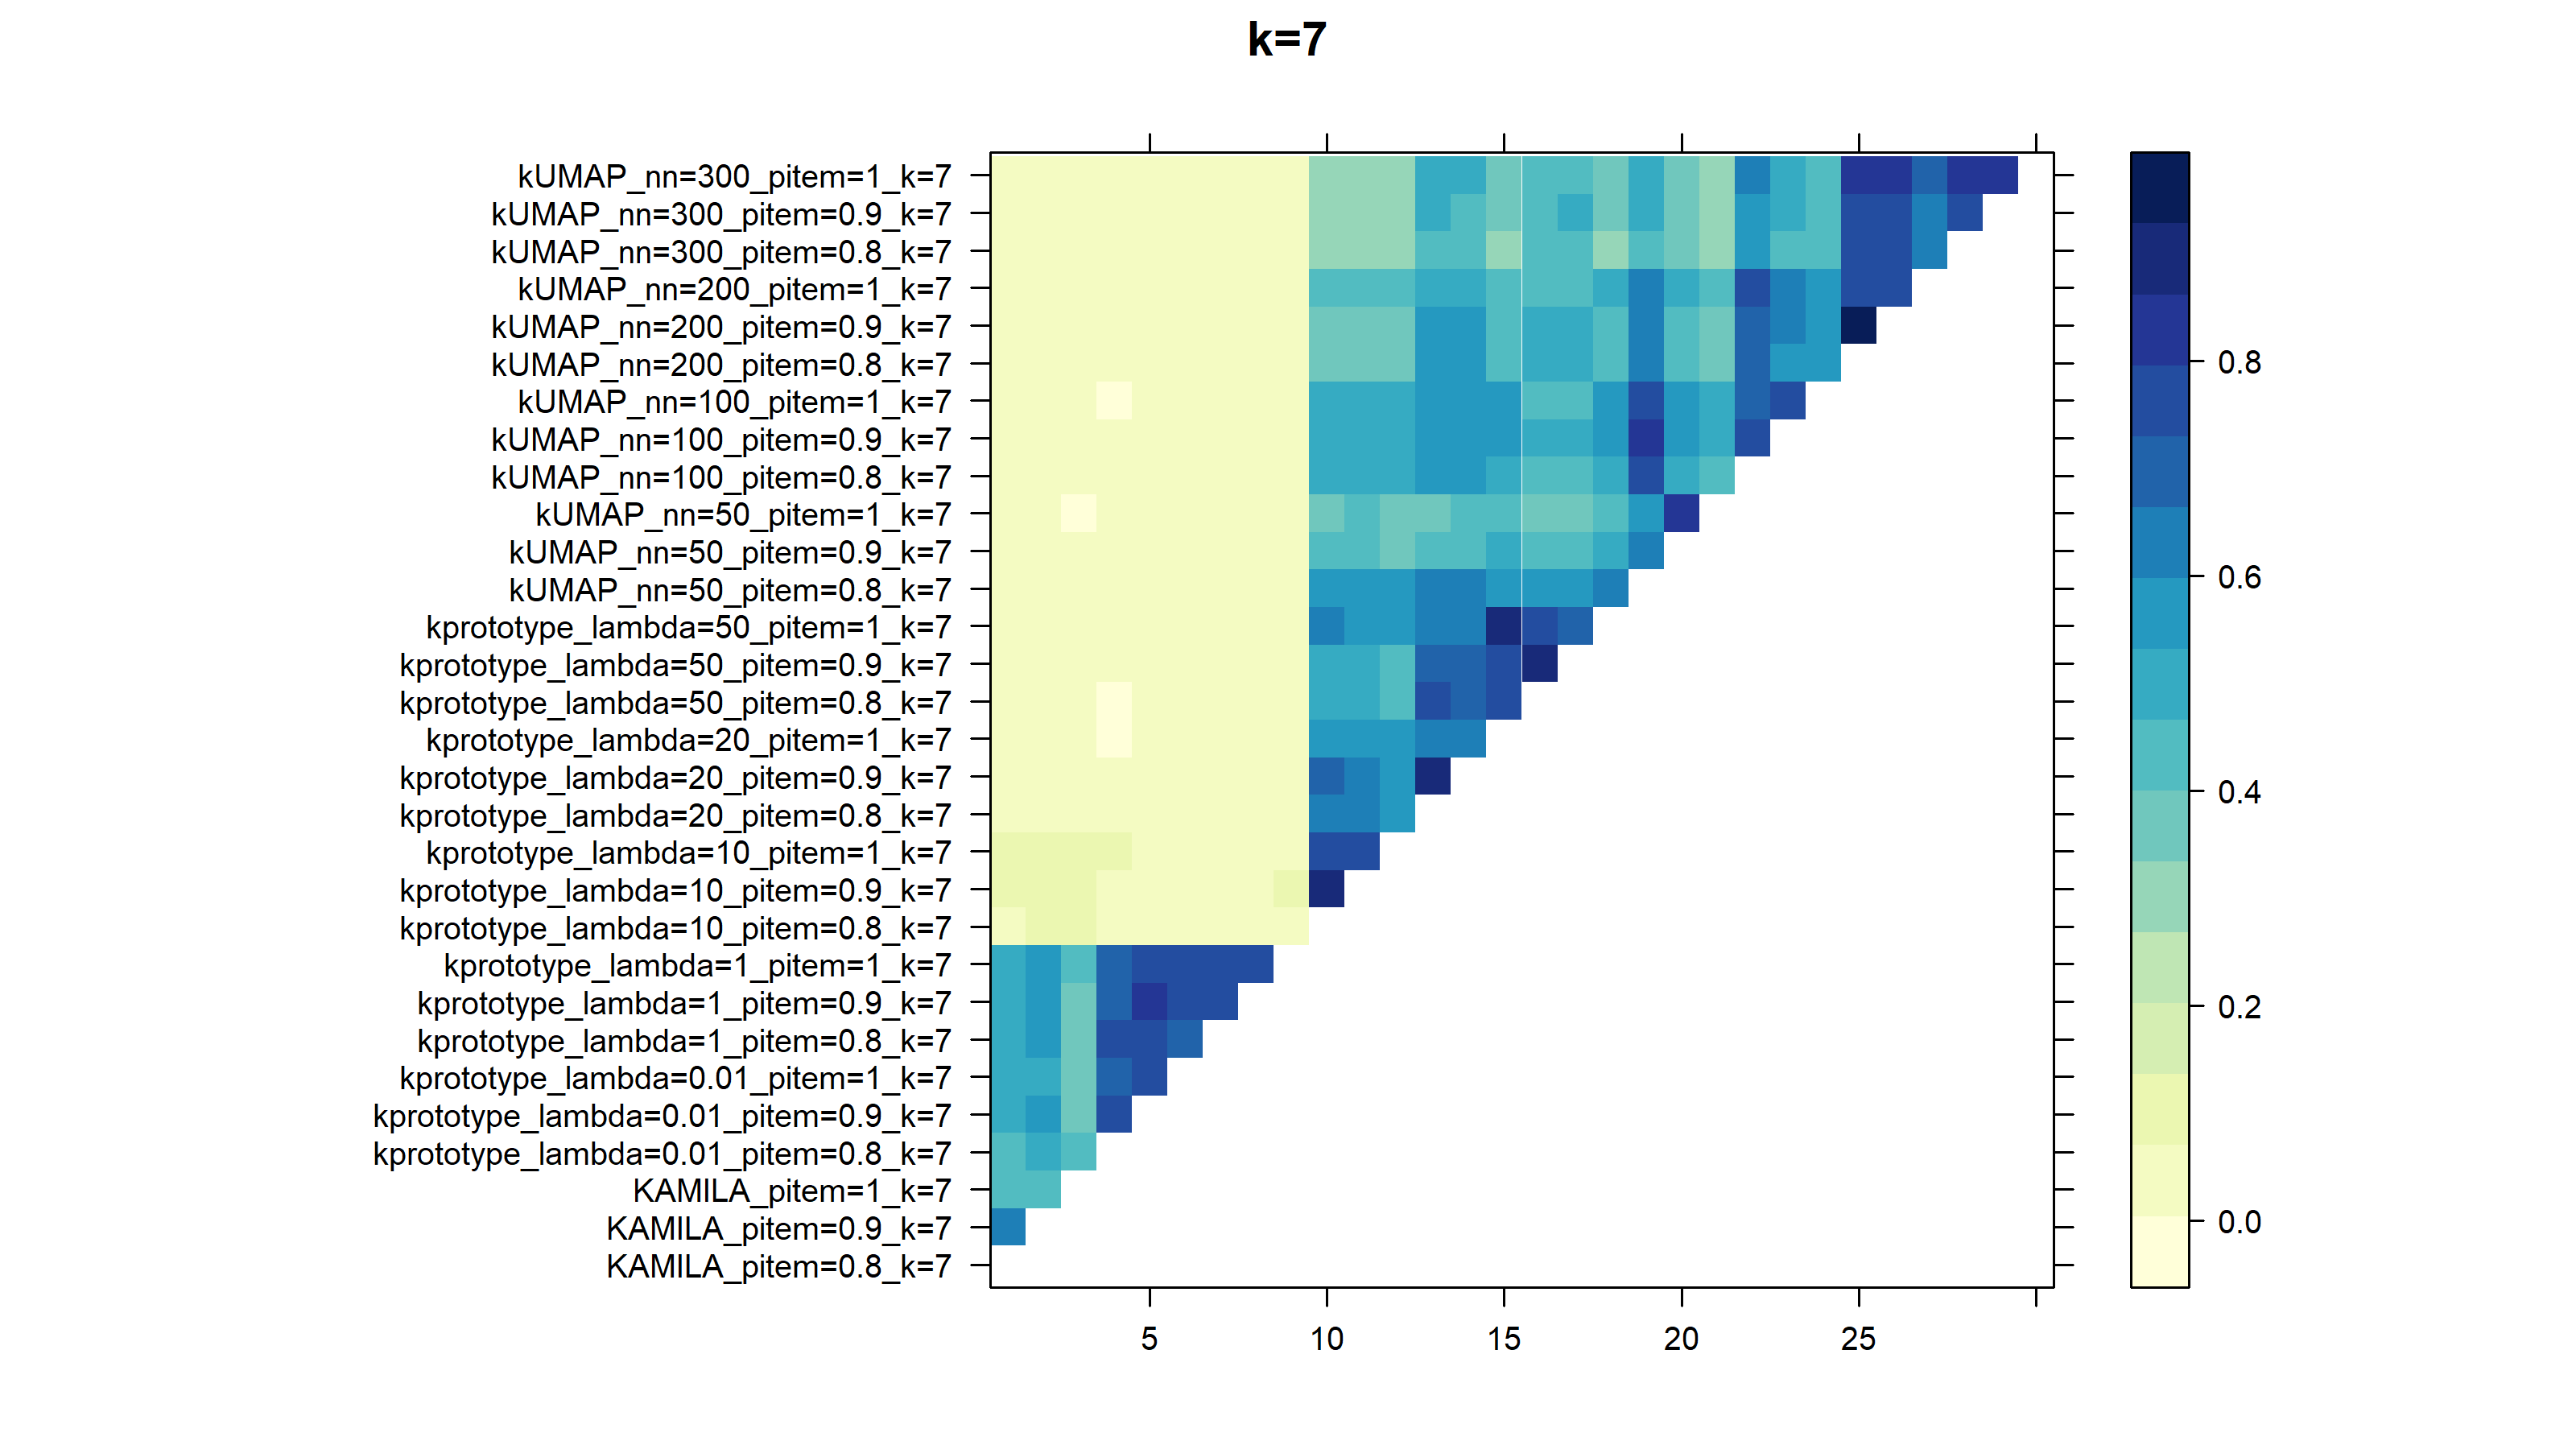


The blue color intensity is proportional to the Adjusted Rand Indexes.

*Abbreviation:* nn = number of neighbors, KAMILA: KAymeans for MIxed LArge data

**Figure S10. Consensus clustering results of k-UMAP [nn = 100]**


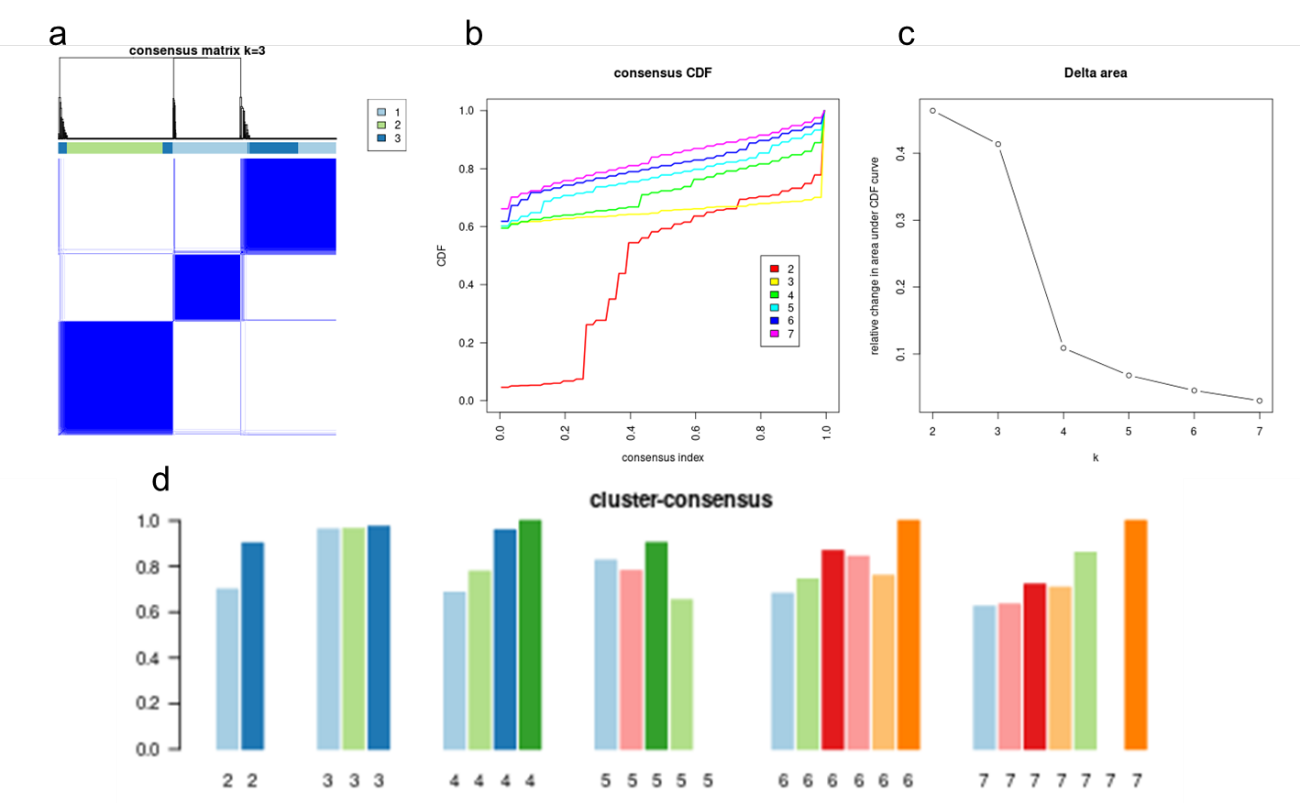


Consensus clustering results of k-UMAP [nn = 100] in derivation dataset (n = 1,756). (a) Heatmaps of the consensus matrices for k = 3. (b) Cumulative distribution function (CDF) of the consensus matrix across k=2 to k=7. (c) Relative change in the area under the CDF curve comparing k and k-1. (d) Cluster-consensus value of clusters for k=2 to k=7. This is the mean of all pairwise consensus values between a cluster's members.

*Aabbreviation:* nn = number of neighbors

**Figure S11. Consensus clustering results of k-UMAP [nn=200]**


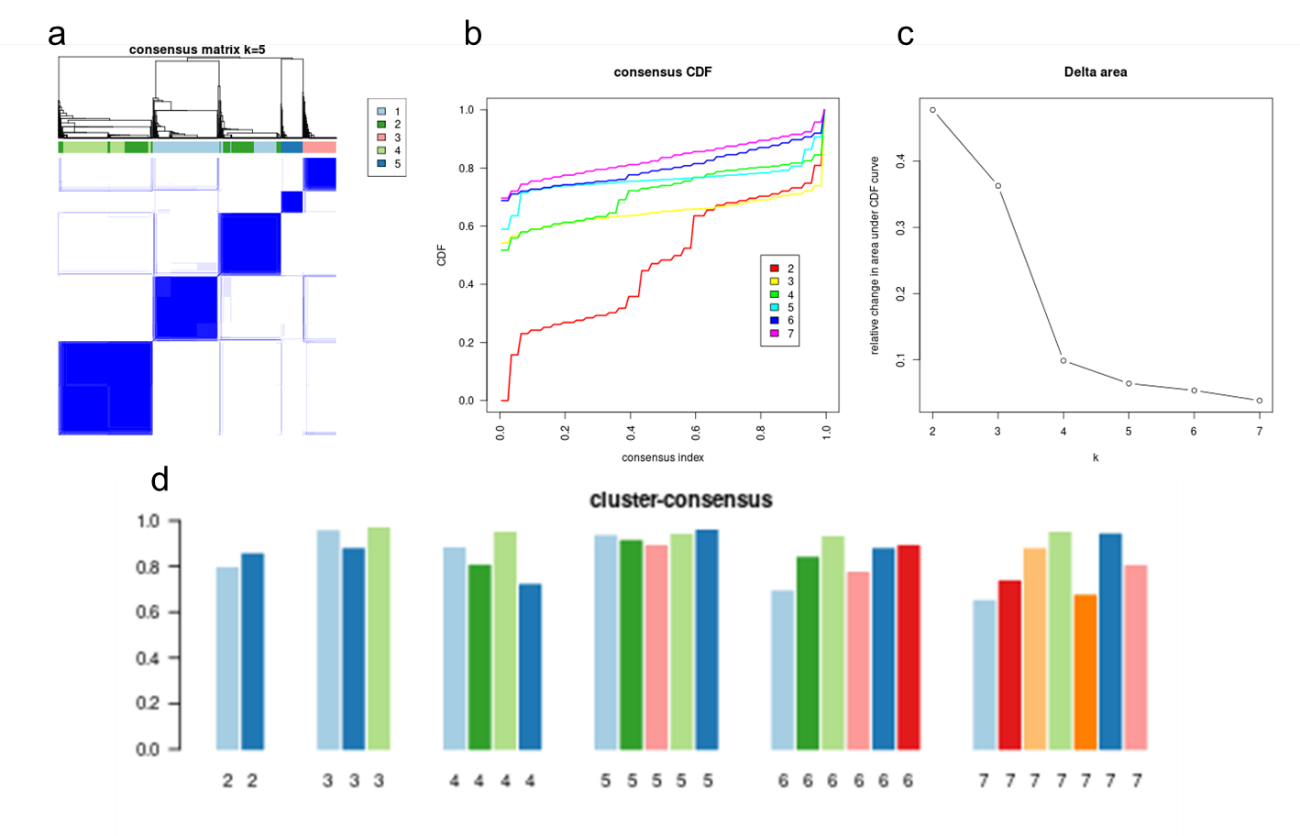


Consensus clustering results of k-UMAP [nn = 200] in derivation dataset (n = 1,756). (a) Heatmaps of the consensus matrices for k = 5. (b) Cumulative distribution function (CDF) of the consensus matrix across k=2 to k=7. (c) Relative change in the area under the CDF curve comparing k and k-1. (d) Cluster-consensus value of clusters for k=2 to k=7. This is the mean of all pairwise consensus values between a cluster's members.

*Abbreviation:* nn = number of neighbors

**Figure S12 Consensus clustering results of KAMILA**


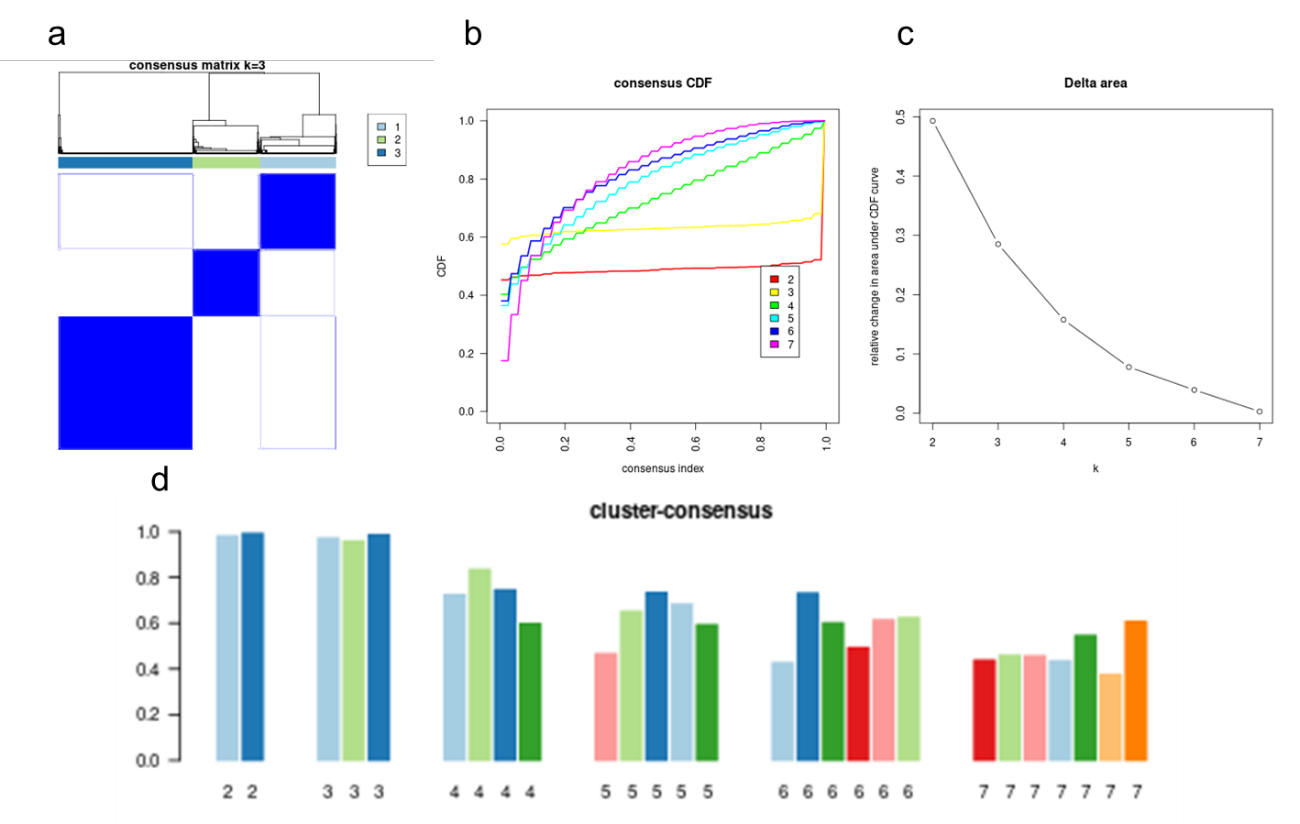


Consensus clustering results of KAMILA in derivation dataset (n = 1,756). (a) Heatmaps of the consensus matrices for k = 3. (b) Cumulative distribution function (CDF) of the consensus matrix across k=2 to k=7. (c) Relative change in the area under the CDF curve comparing k and k-1. (d) Cluster-consensus value of clusters for k=2 to k=7. This is the mean of all pairwise consensus values between a cluster's members.

*Abbreviation:* nn = number of neighbors, KAMILA: KAymeans for MIxed LArge data

**Figure S13. Patients transition of k-UMAP [nn=100, k=3] and k-UMAP [nn=200, k=5]**


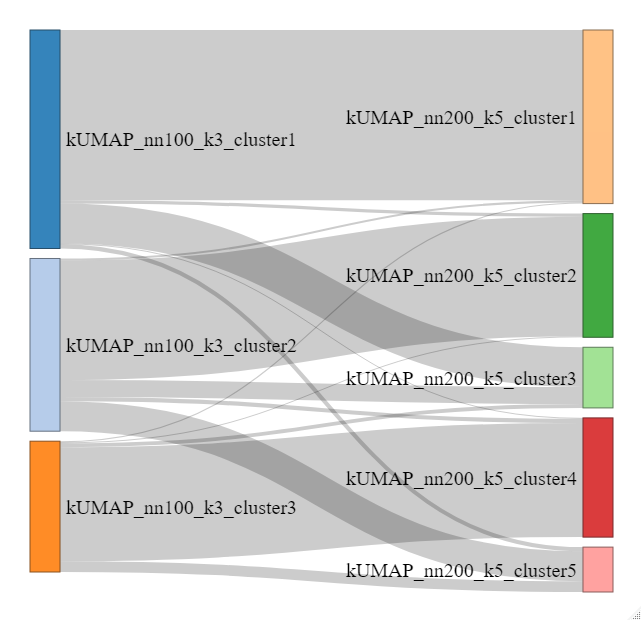


It can be seen that cluster1 in k-UMAP [nn=100, k=3] is divided into cluster1 and cluster3 in k-UMAP [nn=200, k=5], cluster2 in k-UMAP [nn=100, k=3] is mainly divided into cluster2 and cluster5 in k-UMAP [nn200, k=5], and cluster3 in k-UMAP [nn=100, k=3] is transferred to cluster4 in k-UMAP [nn=200, k=5]

*Abbreviation:* nn = number of neighbors, k = number of clusters

**Figure S14. Consensus clustering results of k-UMAP [nn=100] in validation dataset**


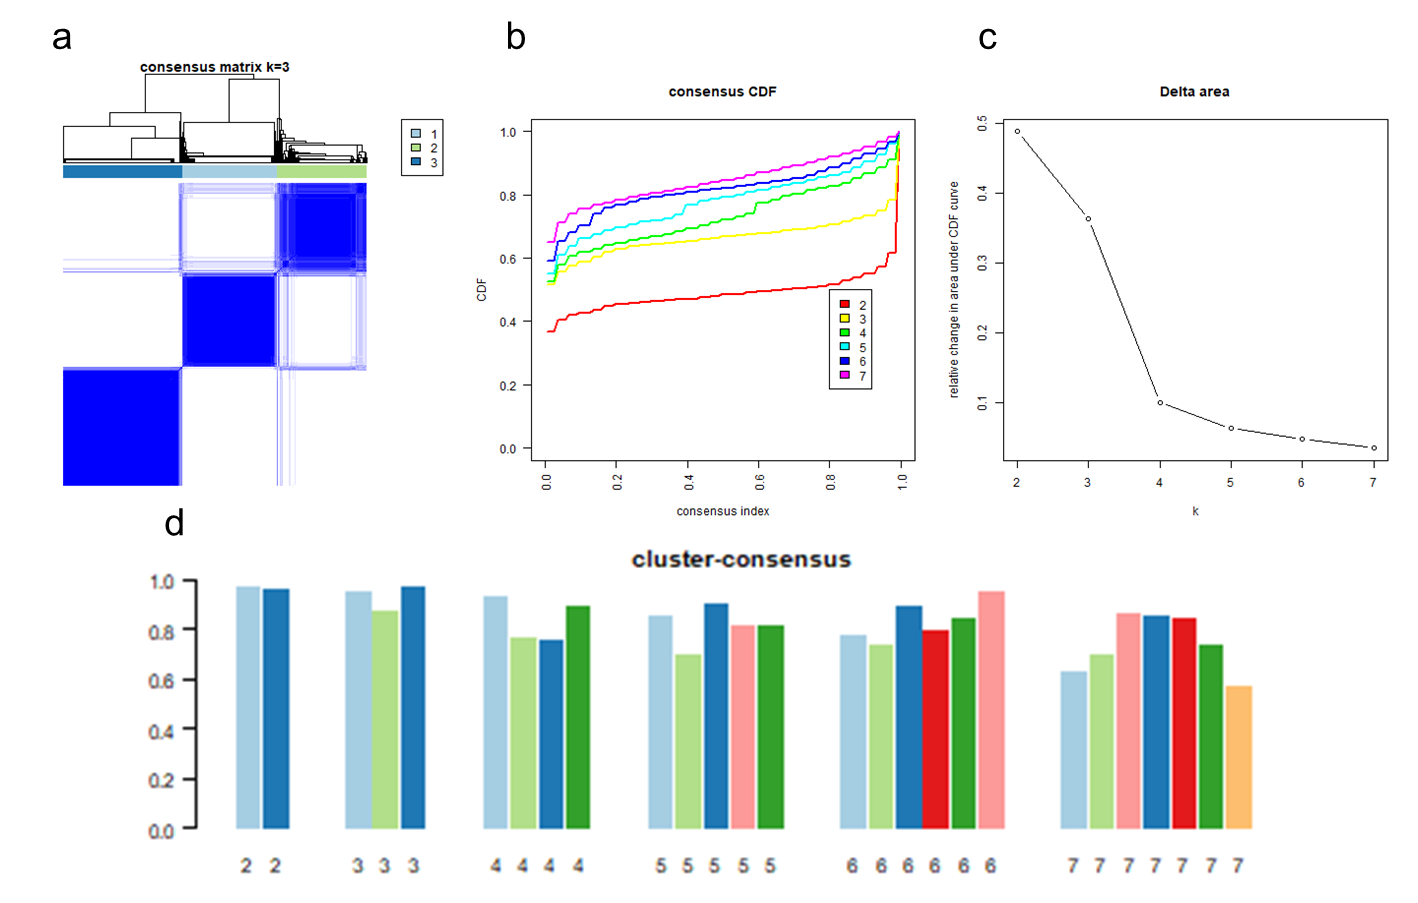


Consensus clustering results of k-UMAP [nn = 100] in validation dataset (n = 672). (a) Heatmaps of the consensus matrices for k = 3. (b) Cumulative distribution function (CDF) of the consensus matrix across k=2 to k=7. (c) Relative change in the area under the CDF curve comparing k and k-1. (d) Cluster-consensus value of clusters for k=2 to k=7. This is the mean of all pairwise consensus values between a cluster's members.

*Abbreviation:* nn = number of neighbors

**Figure S15. UMAP plot of derivation and validation cluster**


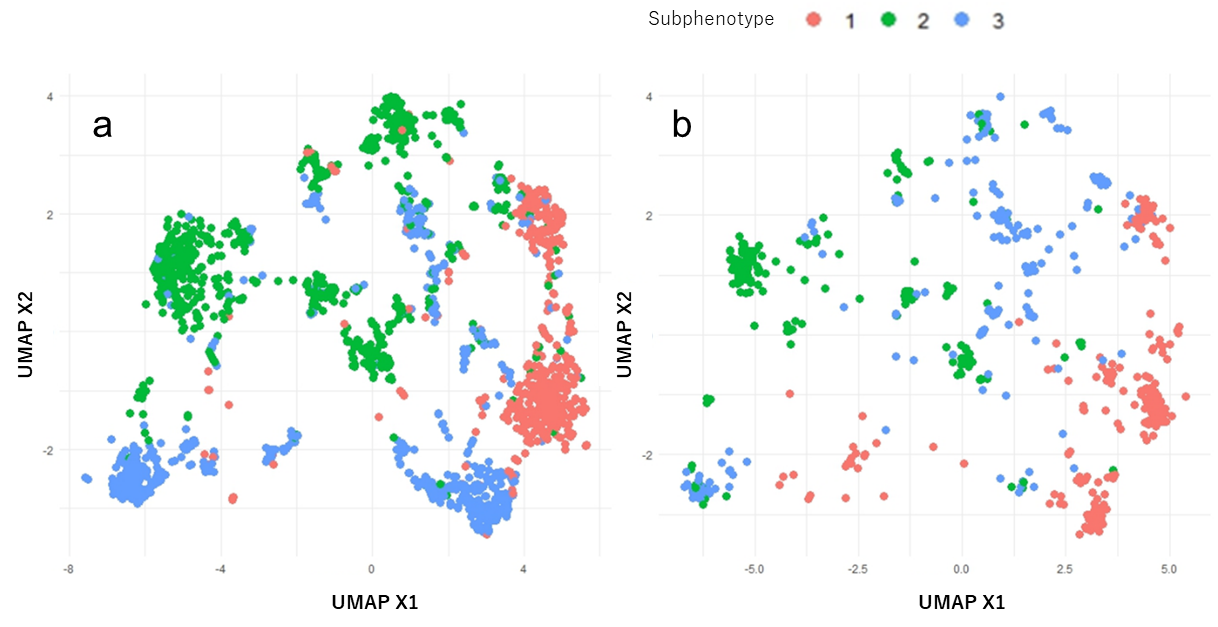


Visualization of subphenotypes using Uniform Manifold Approximation and Projection for Dimension Reduction (UMAP) in the derivation (a) and validation (b) datasets. Subphenotypes were shown in color from k-UMAP [nn=100, k=3].

*Abbreviation:* UMAP = Uniform Manifold Approximation and Projection for Dimension Reduction

| **Table S5. Characteristics of patients clustered using k-UMAP [nn=200, k=3].** | | | | | | | |
| --- | --- | --- | --- | --- | --- | --- | --- |
|  | ALL | Subphenotypes | | | | | *P* value | |
|  | subphenotype 1 | subphenotype 2 | subphenotype 3 | subphenotype 4 | subphenotype 5 |
| Variables | n = 1,756 | n = 407 | n = 587 | n = 126 | n = 425 | n = 211 |  | |
| Age, mean (SD) | 71.0 (±14.6) | 73.5 (±15.3) | 70.4 (±14.6) | 70.2 (±12.3) | 67.5 (±15.2) | 75.7 (±10.5) | < 0.001 | |
| Sex Male (%) | 61.1 | 0.7 | 99.0 | 29.4 | 64.7 | 83.9 | < 0.001 | |
| BMI, median (IQR) | 21.9 (19.1-24.7) | 21.5 (18.6-24.8) | 21.8 (19.1-24.8) | 22.0 (18.9-24.7) | 21.8 (19.2-24.4) | 22.6 (19.9-24.8) | 0.12 | |
| Admission from ER (%) | 64.2 | 91.9 | 90.3 | 50.0 | 1.9 | 71.6 | < 0.001 | |
| Past Medical history (%) |  |  |  |  |  |  |  | |
| Acute myocardial infarction | 4.7 | 0.7 | 2.4 | 8.7 | 3.1 | 19.9 | < 0.001 | |
| Acute Heart Failure | 10.8 | 7.6 | 6.1 | 8.7 | 8.7 | 35.1 | < 0.001 | |
| Peripheral Arterial Disease | 3.0 | 1.7 | 1.5 | 4.8 | 1.7 | 11.4 | < 0.001 | |
| Stroke | 12.5 | 10.8 | 8.4 | 20.6 | 6.1 | 35.1 | < 0.001 | |
| Chronic Lung Disease | 5.7 | 3.9 | 7.7 | 8.7 | 4.2 | 5.2 | 0.03 | |
| Collagen Disease | 6.4 | 2.0 | 2.2 | 66.7 | 1.2 | 1.4 | < 0.001 | |
| Peptic Ulcer | 3.2 | 2.2 | 4.3 | 4.0 | 2.4 | 3.8 | 0.31 | |
| Liver Disease | 5.1 | 5.2 | 4.8 | 3.2 | 7.3 | 2.8 | 0.11 | |
| Diabetes | 25.2 | 25.3 | 23.5 | 27.8 | 16.0 | 46.5 | < 0.001 | |
| Chronic kidney disease | 8.1 | 5.4 | 4.8 | 7.9 | 4.9 | 28.9 | < 0.001 | |
| Malignancy | 13.8 | 12.0 | 14.0 | 6.4 | 21.2 | 6.2 | < 0.001 | |
| Metastatic Neoplasm | 2.2 | 0.3 | 1.7 | 0.0 | 5.9 | 1.9 | < 0.001 | |
| Medication (%) |  |  |  |  |  |  |  | |
| Steroid | 12.1 | 5.7 | 5.0 | 83.3 | 9.7 | 7.1 | < 0.001 | |
| Immunosuppressant | 3.8 | 1.0 | 0.5 | 29.4 | 4.2 | 1.9 | < 0.001 | |
| Statin | 10.7 | 10.3 | 7.0 | 14.3 | 5.7 | 29.4 | < 0.001 | |
| Antiplatelet | 15.6 | 5.9 | 5.1 | 34.9 | 8.2 | 66.4 | < 0.001 | |
| Beta Blocker | 9.2 | 5.2 | 4.4 | 7.9 | 6.1 | 37.0 | < 0.001 | |
| Radiotherapy | 0.4 | 0.0 | 0.5 | 0.0 | 0.9 | 0.0 | 0.18 | |
| Vital signs, median (IQR) |  |  |  |  |  |  |  | |
| Glasgow Coma Scale | 14 (10-15) | 14 (9-15) | 14 (9-15) | 14 (12-15) | 14 (10-15) | 14 (10-15) | 0.03 | |
| Respiratory rate (/min) | 25 (20-30) | 25 (21-30) | 25 (21-30) | 24 (20-30) | 24 (20-30) | 24 (20-30) | 0.03 | |
| Heart Rate (/min) | 109 (94-124) | 108 (93-124) | 111 (97-127) | 106 (93-123) | 110 (94-124) | 101 (87-119) | < 0.001 | |
| Systolic blood pressure (mmHg) | 101 (82-127) | 105 (84-130) | 103 (83-129) | 91 (79-111) | 95 (80-122) | 105 (85-138) | < 0.001 | |
| Diastolic blood pressure (mmHg) | 59 (47-74) | 60 (47-74) | 61 (48-76) | 55 (45-69) | 56 (45-73) | 60 (50-75) | 0.007 | |
| Body Temperature (℃) | 37.6 (36.7-38.7) | 37.8 (36.6-38.6) | 37.8 (36.8-39.0) | 37.4 (36.7-38.5) | 37.3 (36.6-38.4) | 37.5 (36.6-38.4) | 0.002 | |
| Blood test Data, median (IQR) |  |  |  |  |  |  |  | |
| WBC (103/µL) | 11.4 (6.0-17.8) | 11.2 (6.3-17.9) | 10.9 (5.4-17.2) | 12.4 (6.9-18.5) | 11.2 (5.1-18.3) | 12.9 (7.3-18.6) | 0.09 | |
| Hematocrit (%) | 34.0 (28.8-39.4) | 34.0 (29.1-39.1) | 36.0 (30.1-40.8) | 33.7 (28.5-37.7) | 32.0 (26.7-37.4) | 34.4 (30.4-39.2) | < 0.001 | |
| Platelets (104/µL) | 14.9 (9.4-22.3) | 16.2 (9.6-23.9) | 15.7 (9.8-22.7) | 14.1 (9.7-20.4) | 13.0 (7.0-22.0) | 15.1 (11.9-20.2) | < 0.001 | |
| Creatinine (mg/dL) | 1.4 (0.9-2.5) | 1.2 (0.7-2.1) | 1.4 (0.9-2.3) | 1.3 (0.8-2.3) | 1.4 (0.8-2.5) | 2.1 (1.1-4.0) | < 0.001 | |
| Bilirubin (mg/dL) | 0.9 (0.6-1.5) | 0.8 (0.5-1.4) | 1.0 (0.6-1.7) | 0.8 (0.5-1.2) | 1.0 (0.6-1.8) | 0.8 (0.5-1.3) | < 0.001 | |
| Glucose (mg/dL) | 141 (109-191) | 143 (109-188) | 146 (116-197) | 121 (93-156) | 132 (103-174) | 159 (122-222) | < 0.001 | |
| Sodium (mEq/L) | 137 (133-140) | 137 (134-141) | 137 (133-141) | 137 (133-141) | 136 (132-139) | 136 (133-140) | < 0.001 | |
| Potassium (mEq/L) | 4.0 (3.6-4.6) | 3.9 (3.5-4.5) | 4.1 (3.7-4.6) | 4.0 (3.6-4.4) | 4.0 (3.5-4.6) | 4.3 (3.8-4.8) | < 0.001 | |
| C-reactive protein (mg/dL) | 14.8 (6.2-24.2) | 13.5 (4.6-25.0) | 14.3 (5.6-24.1) | 14.4 (5.2-24.9) | 17.5 (9.7-24.9) | 12.9 (5.5-22.4) | < 0.001 | |
| PT-INR | 1.2 (1.1-1.4) | 1.20 (1.07-1.40) | 1.20 (1.10-1.40) | 1.20 (1.06-1.40) | 1.30 (1.20-1.50) | 1.22 (1.10-1.50) | < 0.001 | |
| APTT (sec) | 35.7 (30.3-44.3) | 34.3 (29.2-42.1) | 34.3 (29.5-41.5) | 34.2 (30.9-43.5) | 40.8 (34.1-49.7) | 35.5 (30.1-43.0) | < 0.001 | |
| D-dimer (µg/mL) | 6.7 (3.0-15.7) | 6.9 (3.0-16.7) | 5.4 (2.6-13.3) | 7.3 (3.5-15.6) | 9.0 (4.1-21.4) | 5.9 (2.6-11.8) | < 0.001 | |
| Fibrinogen (mg/mL) | 439 (313-578) | 446 (325-582) | 457 (315-606) | 374 (288-518) | 436 (302-555) | 439 (330-569) | 0.02 | |
| pH | 7.39 (7.31-7.45) | 7.40 (7.32-7.46) | 7.40 (7.32-7.45) | 7.40 (7.33-7.46) | 7.38 (7.29-7.45) | 7.37 (7.28-7.44) | 0.004 | |
| PaCO2 (mmHg) | 34.0 (28.5-41.2) | 33.2 (28.0-39.5) | 34.5 (29.1-42.0) | 33.2 (29.4-41.1) | 35.0 (29.4-42.4) | 33.2 (27.6-40.0) | 0.04 | |
| PaO2 (mmHg) | 87.5 (69.8-123) | 88.6 (67.7-131.4) | 84.0 (68.0-118.0) | 84.1 (70.9-112.9) | 94.3 (74.0-136.3) | 82.0 (68.1-116.9) | 0.003 | |
| Base excess (mEq/L) | -3.2 (-7.0-0.1) | -2.9 (-6.7-0.5) | -2.6 (-6.5-0.2) | -3.5 (-6.8- 0.1) | -3.5 (-7.4- 0.1) | -4.3 (-9.3- -1.0) | 0.003 | |
| Lactate (mmol/L) | 2.9 (1.9-5.0) | 3.0 (2.0-5.0) | 3.2 (2.0-5.5) | 2.7 (1.7-4.9) | 2.7 (1.6-4.6) | 2.8 (1.7-4.7) | < 0.001 | |
| SOFA score, median (IQR) | 8 (5-11) | 8 (5-11) | 8 (5-11) | 8 (6-11) | 9 (6-12) | 8 (6-12) | 0.02 | |
| Respiration | 2 (1-3) | 2 (1-2) | 2 (1-3) | 2 (1-3) | 2 (1-2) | 2 (1-3) | 0.18 | |
| Coagulation | 1 (0-2) | 0 (0-1) | 0 (0-2) | 1 (0-2) | 1 (0-2) | 0 (0-1) | < 0.001 | |
| Liver | 0 (0-1) | 0 (0-1) | 0 (0-1) | 0 (0-1) | 0 (0-1) | 0 (0-1) | 0.001 | |
| Cardiovascular | 3 (0-4) | 1 (0-4) | 2 (0-4) | 3 (0-4) | 3 (0-4) | 3 (0-4) | 0.004 | |
| Central Nervous System | 1 (0-3) | 1 (1-3) | 1 (1-3) | 1 (0-2) | 1 (0-2) | 2 (1-3) | < 0.001 | |
| Renal | 1 (0-3) | 1 (0-3) | 1 (0-3) | 1 (0-3) | 1 (0-3) | 2 (0-3) | < 0.001 | |
| APACHE II score, median (IQR) | 22 (16-28) | 21 (16-27) | 22 (16-29) | 23 (18-29) | 22 (16-30) | 21 (16-28) | 0.09 | |
| SIRS, median (IQR) | 3 (2-4) | 3 (2-4) | 3 (2-4) | 3 (2-4) | 3 (2-3) | 3 (2-3) | 0.09 | |
| JAAM DIC score, median (IQR) | 3 (2-5) | 3 (2-5) | 3 (2-5) | 3 (2-5) | 4 (2-6) | 3 (2-4) | < 0.001 | |
| Management |  |  |  |  |  |  |  | |
| Noradrenaline | 57.0 | 52.5 | 52.6 | 68.3 | 65.7 | 54.0 | < 0.001 | |
| Vasopressin | 11.9 | 11.8 | 10.8 | 15.9 | 13.2 | 10.4 | 0.44 | |
| Corticosteroids | 27.1 | 21.2 | 24.9 | 42.3 | 33.0 | 23.4 | < 0.001 | |
| Thrombomodulin | 21.1 | 17.5 | 17.9 | 29.5 | 29.4 | 14.6 | < 0.001 | |
| Antithrombin III | 19.5 | 14.9 | 14.9 | 26.2 | 30.9 | 13.7 | < 0.001 | |
| Immunoglobulin | 19.5 | 15.7 | 14.1 | 24.4 | 32.5 | 12.2 | < 0.001 | |
| PMX-DHP | 8.2 | 7.0 | 7.9 | 4.9 | 11.5 | 6.8 | 0.06 | |
| Outcomes |  |  |  |  |  |  |  | |
| In-hospital death (%) | 22.1 | 18.5 | 21.1 | 24.4 | 24.6 | 24.8 | 0.19 | |
| *Abbreviation:* nn = number of neighbors, SD = standard deviation, IQR = interquartile range, ER = emergency room., APTT = Activated partial thromboplastin time  SOFA score = Sequential Organ Failure Assessment score, APACHE II score = Acute Physiology and Chronic Health Evaluation II score, SIRS = Systemic Inflammatory Response Syndrome, JAAM DIC score = Japanese Association for Acute Medicine Disseminated Intravascular Coagulation score. PMX-DHP = polymyxin B-immobilized fiber column hemoperfusion | | | | | | | | | |

| **Table S6. Characteristics of patients clustered using KAMILA.** | | | | | |
| --- | --- | --- | --- | --- | --- |
|  | ALL | Subphenotypes | | | *P* value |
|  | subphenotype 1 | subphenotype 2 | subphenotype 3 |
| Variables | n = 1,756 | n = 858 | n = 480 | n = 418 |  |
| Age, mean (SD) | 71.0 (±14.6) | 71.1 (±14.65 | 73.6 (±13.3) | 68.1 (±15.6) | < 0.001 |
| Sex Male (%) | 61.1 | 59.9 | 64.8 | 59.3 | 0.15 |
| BMI, median (IQR) | 21.9 (19.1-24.7) | 22.2 (19.3-25.2) | 21.2 (18.4-24.2) | 21.8 (19.1-24.4) | 0.002 |
| Admission from ER (%) | 64.1 | 69.4 | 68.5 | 48.2 | < 0.001 |
| Past Medical history (%) |  |  |  |  |  |
| Acute myocardial infarction | 4.7 | 4.8 | 5.6 | 3.6 | 0.36 |
| Acute Heart Failure | 10.8 | 7.1 | 17.9 | 10.1 | < 0.001 |
| Peripheral Arterial Disease | 3.0 | 2.3 | 4.8 | 2.4 | 0.03 |
| Stroke | 12.5 | 13.8 | 15.0 | 6.9 | < 0.001 |
| Chronic Lung Disease | 5.7 | 5.5 | 7.9 | 3.8 | 0.03 |
| Collagen Disease | 6.4 | 6.2 | 5.8 | 7.7 | 0.49 |
| Peptic Ulcer | 3.2 | 2.7 | 4.6 | 2.9 | 0.15 |
| Liver Disease | 5.1 | 2.8 | 3.3 | 12.0 | < 0.001 |
| Diabetes | 25.2 | 26.3 | 27.3 | 20.3 | 0.03 |
| Chronic kidney disease | 8.1 | 4.0 | 16.3 | 7.2 | < 0.001 |
| Malignancy | 13.8 | 12.7 | 9.8 | 20.6 | < 0.001 |
| Metastatic Neoplasm | 2.2 | 2.1 | 1.9 | 3.1 | 0.41 |
| Medication (%) |  |  |  |  |  |
| Steroid | 12.1 | 11.9 | 10.4 | 14.6 | 0.15 |
| Immunosuppressant | 3.8 | 3.3 | 2.5 | 6.2 | 0.008 |
| Statin | 10.7 | 12.1 | 10.2 | 8.2 | 0.09 |
| Antiplatelet | 15.6 | 16.3 | 18.8 | 10.3 | 0.002 |
| Beta Blocker | 9.2 | 7.7 | 12.9 | 7.9 | 0.004 |
| Radiotherapy | 0.4 | 0.1 | 0.4 | 1.0 | 0.08 |
| Vital signs, median (IQR) |  |  |  |  |  |
| Glasgow Coma Scale | 14 (10-15) | 14 (13-15) | 9 (5-13) | 14 (11-15) | < 0.001 |
| Respiratory rate (/min) | 25 (20-30) | 25 (20-30) | 25 (20-30) | 24 (20-30) | 0.75 |
| Heart Rate (/min) | 109 (94-124) | 108 (93-122) | 107 (90-123) | 114 (99-128) | < 0.001 |
| Systolic blood pressure (mmHg) | 101 (82-127) | 118 (96-139) | 88 (73-110) | 88 (76-106) | < 0.001 |
| Diastolic blood pressure (mmHg) | 59 (47-74) | 69 (56-80) | 50 (41-64) | 52 (43-62) | < 0.001 |
| Body Temperature (℃) | 37.6 (36.7-38.7) | 37.9 (37.0-38.9) | 36.9 (36.1-38.0) | 37.6 (36.8-38.7) | < 0.001 |
| Blood test Data, median (IQR) |  |  |  |  |  |
| WBC (103/µL) | 11.4 (6.0-17.8) | 12.1 (6.9-17.8) | 12.2 (6.5-18.3) | 9.4 (3.6-17.0) | < 0.001 |
| Hematocrit (%) | 34.0 (28.8-39.4) | 35.5 (30.6-40.3) | 34.1 (29.0-40.0) | 31.0 (25.4-36.4) | < 0.001 |
| Platelets (104/µL) | 14.9 (9.4-22.3) | 18.1 (12.7-25.3) | 16.7 (11.6-23.6) | 7.1 (4.0-11.1) | < 0.001 |
| Creatinine (mg/dL) | 1.4 (0.9-2.5) | 1.0 (0.7-1.5) | 2.2 (1.4-4.0) | 1.7 (1.1-2.9) | < 0.001 |
| Bilirubin (mg/dL) | 0.9 (0.6-1.5) | 0.8 (0.6-1.3) | 0.7 (0.4-1.1) | 1.6 (0.9-3.1) | < 0.001 |
| Glucose (mg/dL) | 141 (109-191) | 148 (120-191) | 142 (111-215) | 117 (87-164) | < 0.001 |
| Sodium (mEq/L) | 137 (133-140) | 137 (133-140) | 137 (133-141) | 137 (133-140) | 0.04 |
| Potassium (mEq/L) | 4.0 (3.6-4.6) | 3.9 (3.5-4.4) | 4.5 (4.0-5.2) | 3.9 (3.4-4.4) | < 0.001 |
| C-reactive protein (mg/dL) | 14.8 (6.2-24.2) | 14.1 (5.1-24.7) | 14.3 (5.7-23.6) | 16.2 (9.1-23.7) | 0.01 |
| PT-INR | 1.2 (1.1-1.4) | 1.18 (1.07-1.30) | 1.26 (1.10-1.40) | 1.40 (1.25-1.79) | < 0.001 |
| APTT (sec) | 35.7 (30.3-44.3) | 32.8 (28.6-37.9) | 36.7 (31.2-45.7) | 44.2 (36.7-56.2) | < 0.001 |
| D-dimer (µg/mL) | 6.7 (3.0-15.7) | 4.4 (2.2-9.1) | 8.2 (4.2-18.8) | 13.3 (5.1-30.6) | < 0.001 |
| Fibrinogen (mg/mL) | 439 (313-578) | 484 (366-630) | 414 (297-542) | 381 (259-508) | < 0.001 |
| pH | 7.39 (7.31-7.45) | 7.43 (7.37-7.47) | 7.30 (7.16-7.38) | 7.39 (7.32-7.46) | < 0.001 |
| PaCO2 (mmHg) | 34.0 (28.5-41.2) | 34.4 (29.6-40.1) | 36.2 (28.8-48.2) | 31.7 (26.5-37.9) | < 0.001 |
| PaO2 (mmHg) | 87.5 (69.8-123) | 80.9 (65.8-105.0) | 96.9 (74.4-144.0) | 95.1 (74.0-139.2) | < 0.001 |
| Base excess (mEq/L) | -3.2 (-7.0-0.1) | -0.9 (-3.7-1.5) | -7.1 (-12.5- -3.4) | -4.4 (-8.6- -1.0) | < 0.001 |
| Lactate (mmol/L) | 2.9 (1.9-5.0) | 2.4 (1.6-3.5) | 4.1 (2.4-7.8) | 3.7 (2.2-5.8) | < 0.001 |
| SOFA score, median (IQR) | 8 (5-11) | 6 (4-8) | 11 (9-13) | 11 (9-13) | < 0.001 |
| Respiration | 2 (1-3) | 2 (1-2) | 2 (1-3) | 2 (1-2) | < 0.001 |
| Coagulation | 1 (0-2) | 0 (0-1) | 0 (0-1) | 2 (1-3) | < 0.001 |
| Liver | 0 (0-1) | 0 (0-1) | 0 (0-1) | 1 (0-2) | < 0.001 |
| Cardiovascular | 3 (0-4) | 0 (0-3) | 3 (1-4) | 3 (1-4) | < 0.001 |
| Central Nervous System | 1 (0-3) | 1 (0-2) | 3 (1-4) | 1 (0-2) | < 0.001 |
| Renal | 1 (0-3) | 0 (0-2) | 2 (1-4) | 2 (1-3) | < 0.001 |
| APACHE II score, median (IQR) | 22 (16-28) | 18 (14-22) | 29 (22-34) | 24 (18-29) | < 0.001 |
| SIRS, median (IQR) | 3 (2-4) | 3 (2-4) | 3 (2-4) | 3 (3-4) | 0.03 |
| JAAM DIC score, median (IQR) | 3 (2-5) | 2 (1-4) | 3 (2-5) | 5 (4-7) | < 0.001 |
| Management (%) |  |  |  |  |  |
| Noradrenaline | 57.0 | 37.1 | 76.5 | 75.5 | < 0.001 |
| Vasopressin | 11.9 | 5.8 | 19.2 | 16.1 | < 0.001 |
| Corticosteroids | 27.1 | 14.8 | 40.5 | 37.5 | < 0.001 |
| Thrombomodulin | 21.1 | 11.6 | 21.4 | 40.9 | < 0.001 |
| Antithrombin III | 19.5 | 9.8 | 22.1 | 36.9 | < 0.001 |
| Immunoglobulin | 19.5 | 12.8 | 21.8 | 31.0 | < 0.001 |
| PMX-DHP | 8.2 | 4.3 | 11.5 | 12.8 | < 0.001 |
| Outcomes |  |  |  |  |  |
| In-hospital death (%) | 22.1 | 11.3 | 31.2 | 34.2 | < 0.001 |
| *Abbreviation:* nn = number of neighbors, KAMILA: KAymeans for MIxed LArge data, SD = standard deviation, IQR = interquartile range, ER = emergency room., APTT = Activated partial thromboplastin time, SOFA score = Sequential Organ Failure Assessment score, APACHE II score = Acute Physiology and Chronic Health Evaluation II score, SIRS = Systemic Inflammatory Response Syndrome, JAAM DIC score = Japanese Association for Acute Medicine Disseminated Intravascular Coagulation score.　PMX-DHP = polymyxin B-immobilized fiber column hemoperfusion | | | | | |

| **Table S7. Characteristics of patients clustered using k-UMAP [nn = 100, k=3] in validation dataset** | | | | | |
| --- | --- | --- | --- | --- | --- |
|  | ALL | Subphenotypes | | | *P-*value |
|  | subphenotype 1 | subphenotype 2 | subphenotype 3 |
| Variables | n = 672 | n = 264 | n = 209 | n = 199 |  |
| Age, mean (SD) | 69.6 (±15.3) | 70.9 (±16.4) | 68.7 (±15.6) | 69.0 (±13.4) | 0.04 |
| Sex Male (%) | 59.2 | 2.7 | 99.5 | 92.0 | < 0.001 |
| BMI, median (IQR) | 21.8 (19.1-24.5) | 21.8 (19.1-24.5) | 21.6 (18.8-25.0) | 22.0 (19.5-24.2) | 0.88 |
| Admission from ER (%) | 65.3 | 62.5 | 87.17 | 46.2 | < 0.001 |
| Past Medical history (%) |  |  |  |  |  |
| Acute myocardial infarction | 5.1 | 1.9 | 5.3 | 9.1 | 0.002 |
| Acute Heart Failure | 9.2 | 6.8 | 5.7 | 16.1 | < 0.001 |
| Peripheral Arterial Disease | 2.8 | 0.8 | 2.4 | 6.0 | 0.003 |
| Stroke | 8.5 | 8.0 | 7.2 | 10.6 | 0.44 |
| Chronic Lung Disease | 7.9 | 6.8 | 6.7 | 10.6 | 0.25 |
| Collagen Disease | 7.1 | 11.0 | 1.9 | 7.5 | < 0.001 |
| Peptic Ulcer | 4.6 | 3.4 | 6.7 | 4.0 | 0.21 |
| Liver Disease | 7.1 | 6.1 | 8.6 | 7.0 | 0.56 |
| Diabetes | 26.5 | 21.6 | 7.2 | 53.3 | < 0.001 |
| Chronic kidney disease | 10.6 | 3.0 | 1.4 | 30.1 | < 0.001 |
| Malignancy | 10.4 | 7.6 | 13.9 | 10.6 | 0.08 |
| Metastatic Neoplasm | 3.7 | 3.0 | 4.3 | 4.0 | 0.75 |
| Vital signs, median (IQR) |  |  |  |  |  |
| Glasgow Coma Scale | 12 (8-15) | 13 (8-15) | 12 (7-14) | 13 (8-15) | 0.27 |
| Respiratory rate (/min) | 23 (19-29) | 22 (18-28) | 22 (18-30) | 24 (19-30) | 0.18 |
| Heart Rate (/min) | 107 (90-125) | 108 (90-124) | 108 (90-129) | 105 (86-124) | 0.45 |
| Systolic blood pressure (mmHg) | 101 (80-127) | 96 (79-123) | 98 (77-121) | 109 (87-137) | < 0.001 |
| Diastolic blood pressure (mmHg) | 59 (46-73) | 57 (45-71) | 58 (45-71) | 62 (50-78) | 0.06 |
| Body Temperature (℃) | 37.5 (36.5-38.6) | 37.5 (36.5-38.6) | 37.7 (36.6-38.6) | 37.4 (36.5-38.6) | 0.33 |
| Blood test Data, median (IQR) |  |  |  |  |  |
| WBC (103/µL) | 11.2 (5.916.0) | 11.2 (5.6-15.6) | 10.4 (5.7-15.8) | 11.7 (7.1-16.9) | 0.37 |
| Hematocrit (%) | 35.0 (29.4-40.3) | 33.8 (28.7-39.0) | 38.0 (32.0-42.6) | 33.2 (28.7-38.4) | < 0.001 |
| Platelets (104/µL) | 16.8 (10.9-24.3) | 16.8 (10.5-24.0) | 17.1 (11.5-24.1) | 16.3 (9.8-25.0) | 0.66 |
| Creatinine (mg/dL) | 1.5 (0.9-2.8) | 1.2 (0.8-2.4) | 1.4 (0.9-2.2) | 2.2 (1.3-4.7) | < 0.001 |
| Bilirubin (mg/dL) | 0.8 (0.5-1.4) | 0.7 (0.5-1.2) | 0.9 (0.6-1.5) | 0.9 (0.5-1.5) | 0.002 |
| Glucose (mg/dL) | 142 (107-205) | 139 (107-200) | 143 (106-199) | 154 (109-214) | 0.25 |
| Sodium (mEq/L) | 137 (133-141) | 138 (134-141) | 138 (134-141) | 136 (132-140) | 0.02 |
| Potassium (mEq/L) | 4.1 (3.6-4.6) | 3.9 (3.5-4.5) | 4.1 (3.7-4.6) | 4.2 (3.7-4.9) | < 0.001 |
| C-reactive protein (mg/dL) | 12.4 (4.5-23.7) | 12.5 (4.3-23.8) | 8.9 (2.7-19.1) | 17.6 (7.4-27.3) | < 0.001 |
| PT-INR | 1.2 (1.1-1.4) | 1.2 (1.1-1.3) | 1.2 (1.1-1.3) | 1.2 (1.1-1.5) | 0.03 |
| D-dimer (µg/mL) | 6.7 (3.0-14.9) | 7.6 (3.1-19.8) | 7.1 (3.2-14.9) | 5.4 (2.8-10.4) | 0.02 |
| Fibrinogen (mg/mL) | 421 (302-570) | 419 (310-556) | 381 (269-503) | 492 (322-654) | < 0.001 |
| pH | 7.39 (7.29-7.45) | 7.41 (7.30-7.46) | 7.37 (7.25-7.44) | 7.39 (7.30-7.46) | 0.008 |
| PaCO2 (mmHg) | 34.5 (28.8-42.6) | 33.3 (28.0-40.6) | 35.7 (30.1-43.3) | 34.0 (28.5-42.9) | 0.05 |
| PaO2 (mmHg) | 98.0 (72.5-154.8) | 110 (74.6-179.8) | 94.3 (7.4-158.3) | 89.9 (70.7-127.3) | 0.008 |
| Lactate (mmol/L) | 2.8 (1.6-5.1) | 2.8 (1.5-5.0) | 3.5 (1.9-5.5) | 2.4 (1.5-4.8) | 0.004 |
| SOFA score, median (IQR) | 8 (5-11) | 8 (5-10) | 8 (6-10) | 9 (6-12) | 0.02 |
| Respiration | 2 (1-2) | 2 (1-2) | 2 (1-3) | 2 (1-3) | 0.005 |
| Coagulation | 0 (0-1) | 0 (0-1) | 0 (0-1) | 0 (0-2) | 0.67 |
| Liver | 0 (0-1) | 0 (0-1) | 0 (0-1) | 0 (0-1) | 0.002 |
| Cardiovascular | 1 (0-4) | 1 (0-4) | 1 (0-4) | 1 (0-4) | 0.38 |
| Central Nervous System | 2 (0-3) | 1 (0-3) | 2 (1-3) | 1 (0-3) | 0.05 |
| Renal | 1 (0-3) | 1 (0-3) | 1 (0-3) | 2 (1-4) | < 0.001 |
| APACHE II score, median (IQR) | 21 (27-15) | 20 (14-26) | 21 (15-27) | 23 (16-29) | 0.07 |
| SIRS, median (IQR) | 3 (2-3) | 3 (2-4) | 3 (2-3) | 3 (2-3) | 0.57 |
| JAAM DIC score, median (IQR) | 3 (2-5) | 3 (1-5) | 3 (2-4) | 3 (2-5) | 0.25 |
| Outcomes |  |  |  |  |  |
| In-hospital death (%) | 19.9 | 15.7 | 20.6 | 24.7 | 0.06 |
| *Abbreviation:* nn = number of neighbors, SD = standard deviation, IQR = interquartile range, ER = emergency room., APTT = Activated partial thromboplastin time, SOFA score = Sequential Organ Failure Assessment score, APACHE II score = Acute Physiology and Chronic Health Evaluation II score, SIRS = Systemic Inflammatory Response Syndrome, JAAM DIC score = Japanese Association for Acute Medicine Disseminated Intravascular Coagulation score. PMX-DHP = polymyxin B-immobilized fiber column hemoperfusion | | | | | |

**Figure S16. Odds ratios for interaction of the treatment and subphenotypes for hospital mortality in each clustering methods in septic shock patients**


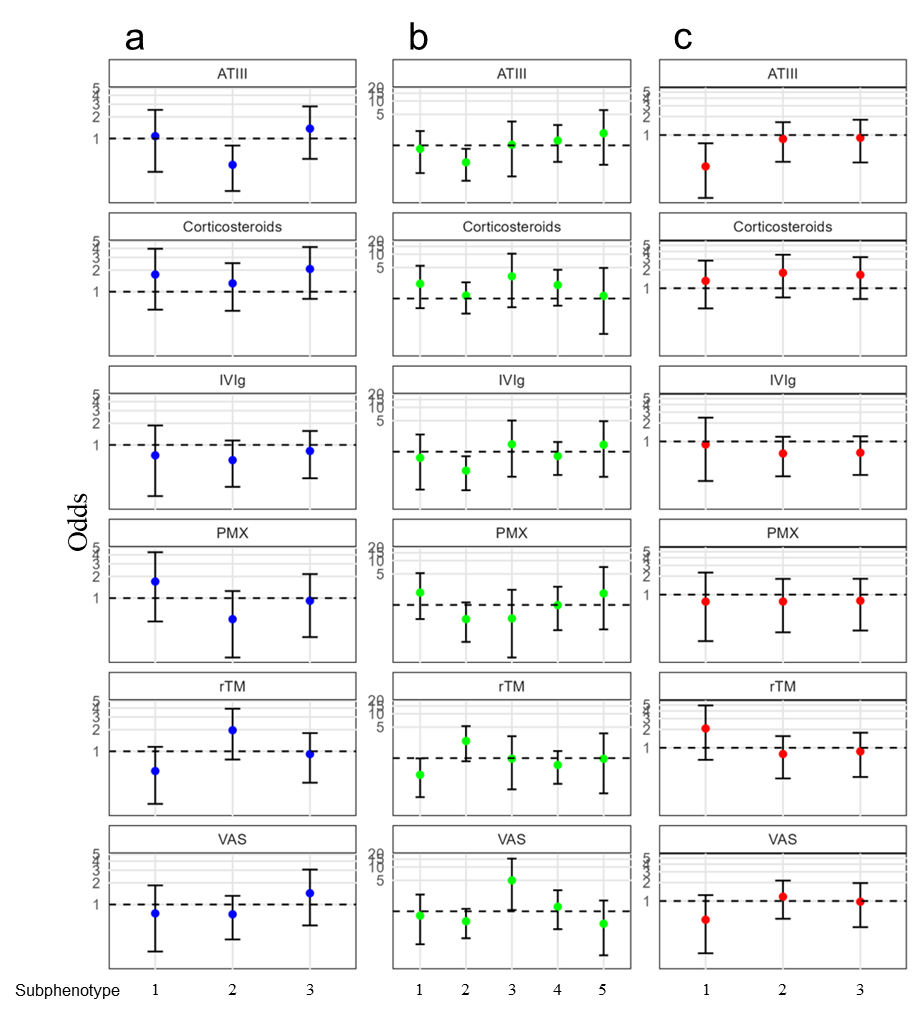


a: k-UMAP [nn=100, k=3], b: k-UMAP [nn=200, k=5], c: KAMILA [k=3]

*Abbreviation:* nn = number of neighbors, KAMILA: KAymeans for MIxed LArge data, ATⅢ= antithrombin III, IVIg = immunoglobulin, PMX = polymyxin B-immobilized fiber column hemoperfusion, rTM = recombinant thrombomodulin, VAS = vasopressin

**Table S8. Comparisons of subphenotypes of sepsis identified in our study and that reported in the Literature**

|  | Number of variables | Number of subphenotypes | High mortality rate | Shock | AKI | Coagulopaty |
| --- | --- | --- | --- | --- | --- | --- |
| k-UMAP [nn=100, k=3] | 52 | 3 | Subphenotype 3 | Subphenotype 2,3 |  | Subphenotype 3 |
| k-UMAP [nn=200, k=5] | 52 | 5 | Subphenotype 3,4,5 | Subphenotype 3,4,5 | Subphenotype 5 | Subphenotype 4 |
| KAMILA [k=3] | 52 | 3 | Subphenotype 2,3 | Subphenotype 2,3 | Subphenotype 2 | Subphenotype 3 |
| *JAMA* 2019, 321:2003-2017. | 29 | 4 | Cluster4(δ) | Cluster4(δ) | Cluster2(β) | Cluster4(δ) |
| *Crit Care*. 2022 Apr  21;26:114. | 15 | 2 | Cluster2(B) | Cluster2(B) | Cluster2(B) | Cluster2(B) |
| *Intensive Care Med* 2022, 48:1582-1592. | 5 | 4 | Cluster1,4(A,D) | Cluster4(D) | - | - |
| *Intensive Care Med* 2023, 49:1349-1359. | 18 | 3 | Cluster2 | Cluster2 | Cluster2 | - |

*Abbreviation:* nn = number of neighbors, KAMILA: KAymeans for MIxed LArge data, AKI = acute kidney injury

**References**

S1. Kudo D, Kushimoto S, Miyagawa N, Sato T, Hasegawa M, Ito F, et al. The impact of organ dysfunctions on mortality in patients with severe sepsis: A multicenter prospective observational study. J Crit Care. 2018;45:178-83.

S2. Abe T, Ogura H, Shiraishi A, Kushimoto S, Saitoh D, Fujishima S, et al. Characteristics, management, and in-hospital mortality among patients with severe sepsis in intensive care units in Japan: the FORECAST study. Critical Care. 2018;22:322.

S3. Abe T, Yamakawa K, Ogura H, Kushimoto S, Saitoh D, Fujishima S, et al. Epidemiology of sepsis and septic shock in intensive care units between sepsis-2 and sepsis-3 populations: sepsis prognostication in intensive care unit and emergency room (SPICE-ICU). J Intensive Care. 2020;8:44.

S4. Abe T, Umemura Y, Ogura H, Kushimoto S, Fujishima S, Saitoh D, et al. Early versus delayed vasopressor administration in patients with septic shock. Acute Med Surg. 2023;10:e852.

S5. Dellinger RP, Levy MM, Rhodes A, Annane D, Gerlach H, Opal SM, et al. Surviving sepsis campaign: international guidelines for management of severe sepsis and septic shock: 2012. Crit Care Med. 2013;41:580-637.

S6. Manu Shankar-Hari M, MSc; Gary S. Phillips, MAS; Mitchell L. Levy, MD; ChristopherW. Seymour, MD, MSc; Vincent X. Liu, MD, MSc; Clifford S. Deutschman, MD; Derek C. Angus, MD, MPh; Gordon D. Rubenfeld, MD, MSc; Mervyn Singer, MD, FRCP; for the Sepsis Definitions Task Force. Developing a NewDefinition and Assessing New Clinical Criteria for Septic Shock For the Third International Consensus Definitions for Sepsis and Septic Shock (Sepsis-3). JAMA. 2016;315:775-87.

S7. Preud'homme G, Duarte K, Dalleau K, Lacomblez C, Bresso E, Smail-Tabbone M, et al. Head-to-head comparison of clustering methods for heterogeneous data: a simulation-driven benchmark. Sci Rep. 2021;11:4202.

S8. Leland McInnes JH, James Melville. UMAP Uniform Manifold Approximation and Projection for Dimension Reduction. arXiv. 2020(1802).

S9. Allaoui M, Kherfi ML, Cheriet A. Considerably Improving Clustering Algorithms Using UMAP Dimensionality Reduction Technique: A Comparative Study. Image and Signal Processing. Lecture Notes in Computer Science2020. p. 317-25.

S10. Szepannek G. clustMixType: User-Friendly Clustering of Mixed-Type Data in R. The R Journal. 2019;10.

S11. GGeoffrey E. Hinton SR. Stochastic Neighbor Embedding. Obermayer SBaSTaK, editor. United States: MIT Press; 2002 September 26, 2003. 833-40 p.

S12. James Melville AL, Mohamed Nadhir Djekidel, Yuhan Hao, Dirk Eddelbuettel. Package ‘uwot’. 2023.

S13. PAUL R. ROSENBAUM DBR. The central role of the propensity score in observational studies for causal effects. Biometrika. 1983;70: 41–55.

S14. Austin PC. An Introduction to Propensity Score Methods for Reducing the Effects of Confounding in Observational Studies. Multivariate Behav Res. 2011;46:399-424.
